# Supplementary material for: Stereoselective Formation of Substituted 1,3-Dioxolanes through a Three-Component Assembly during the Oxidation of Alkenes with Hypervalent Iodine(III)
Source: PubMed Central journal article supplement (PMC6332268; doi:10.3390/molecules200917041), 2015-09-17
Supplement: molecules-20-17041-s001.pdf [file molecules-20-17041-s001.pdf]

# Supplementary Materials

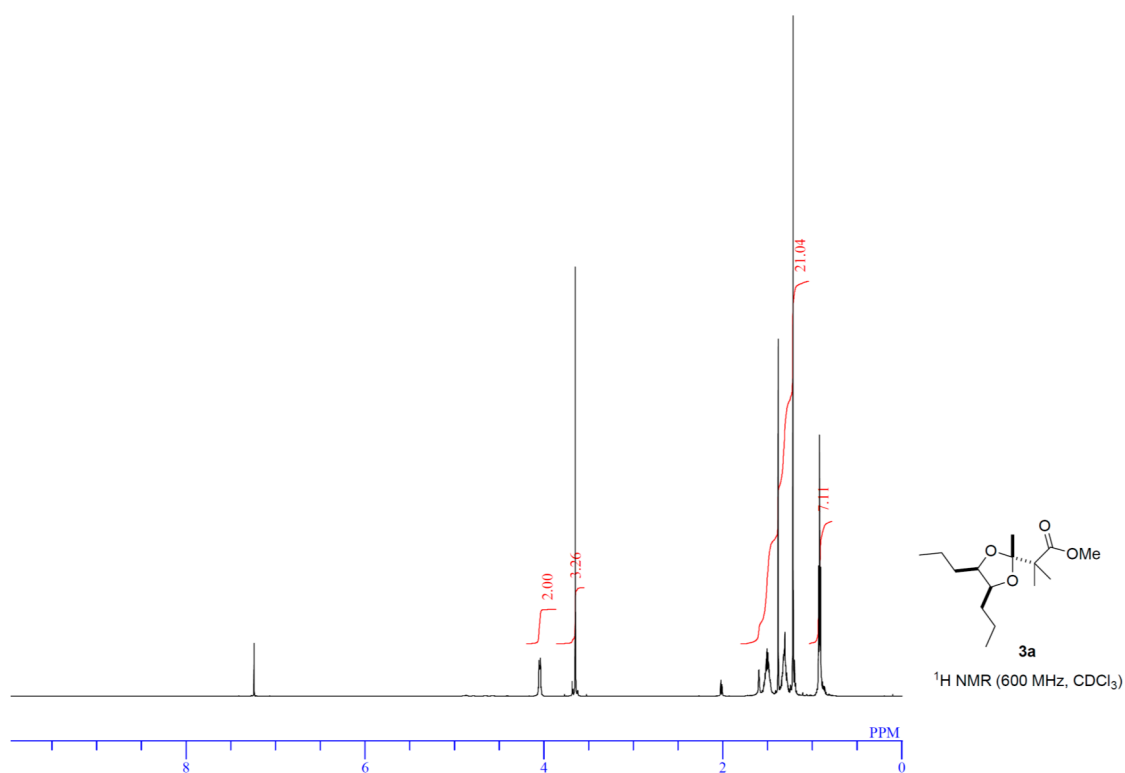

Figure S1. Proton NMR of 3a.

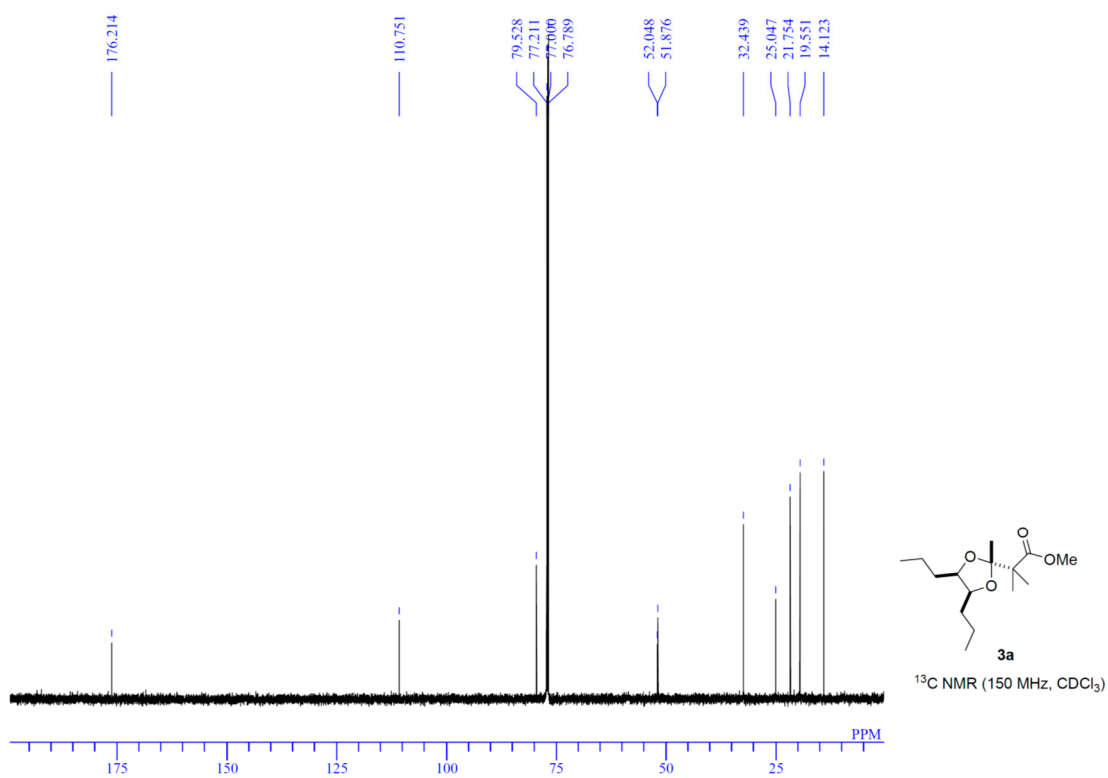

Figure S2. Carbon-13 NMR of 3a.

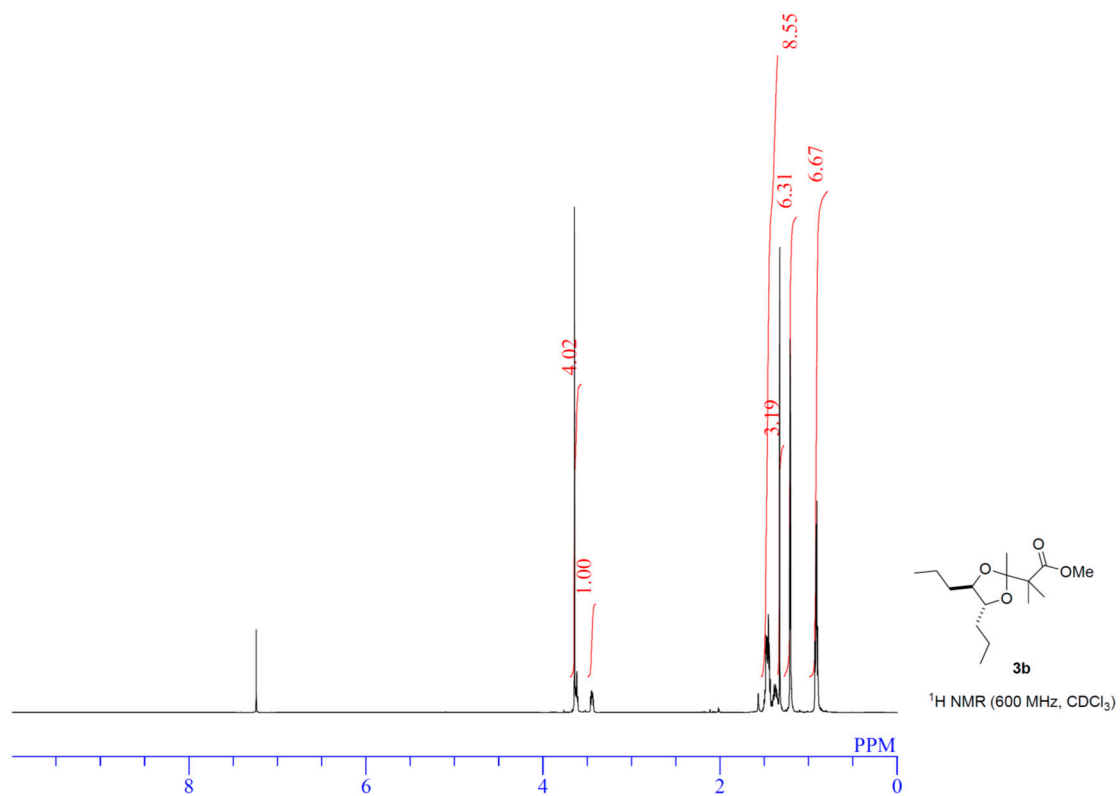

**Figure S3. Proton NMR of 3b.**

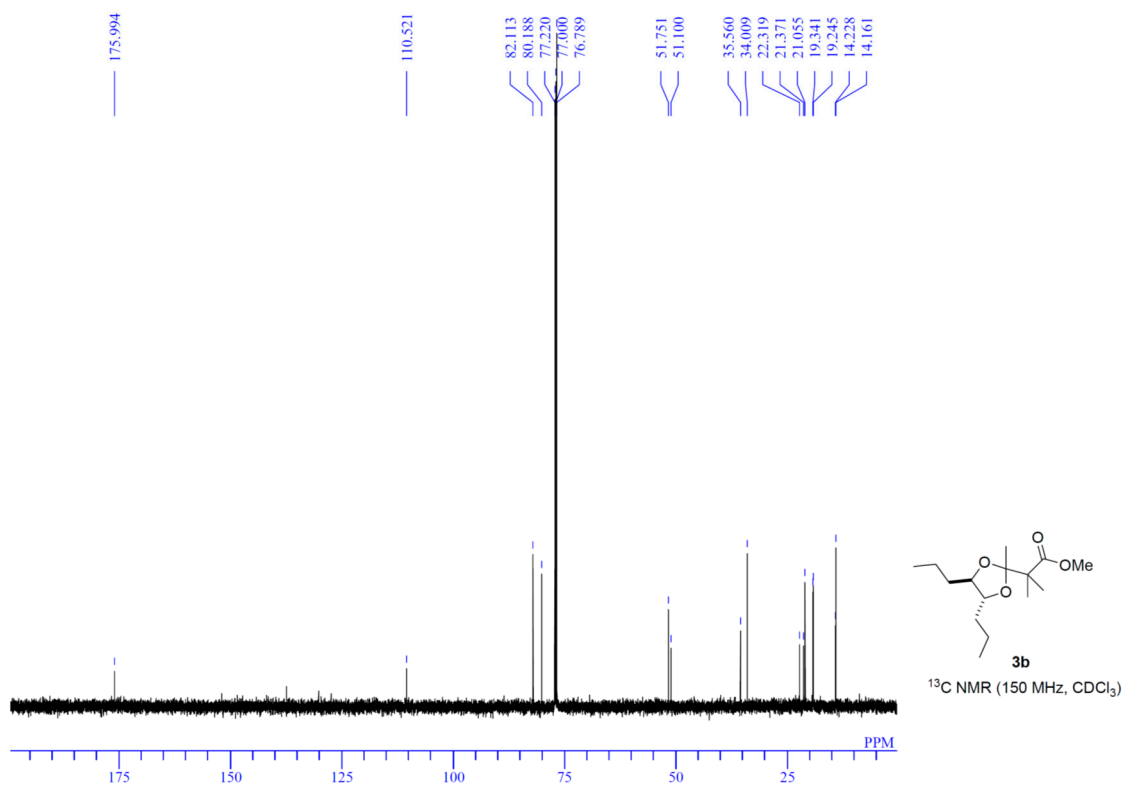

**Figure S4. Carbon-13 NMR of 3b.**



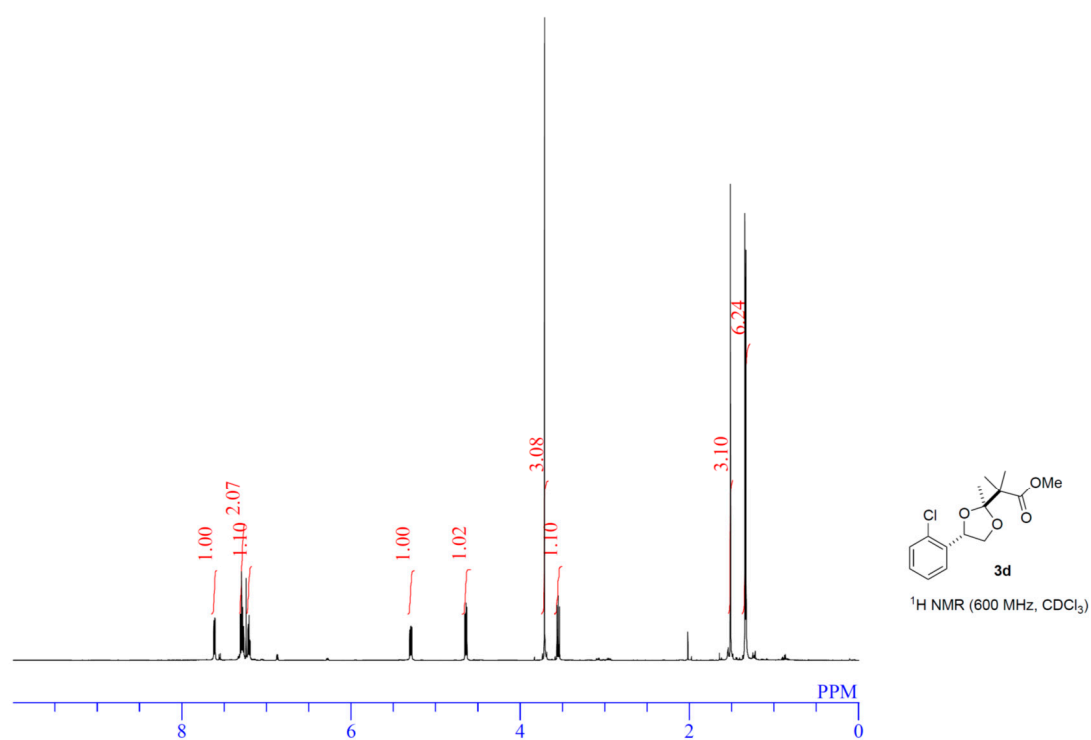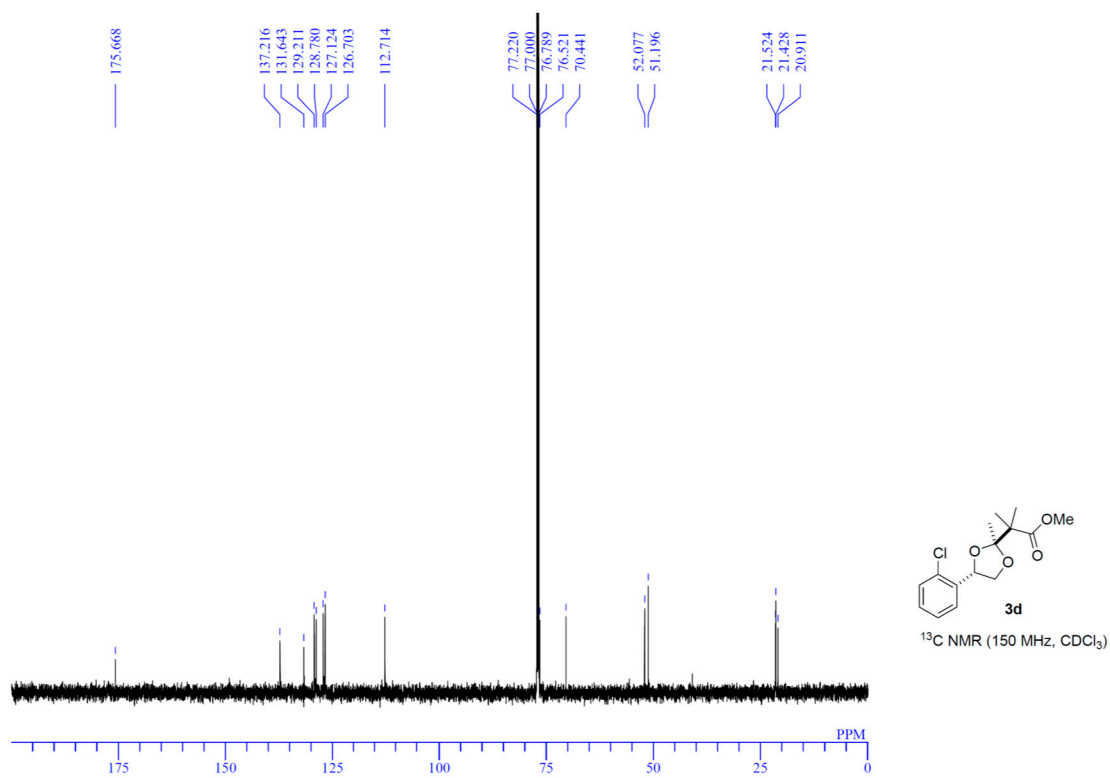

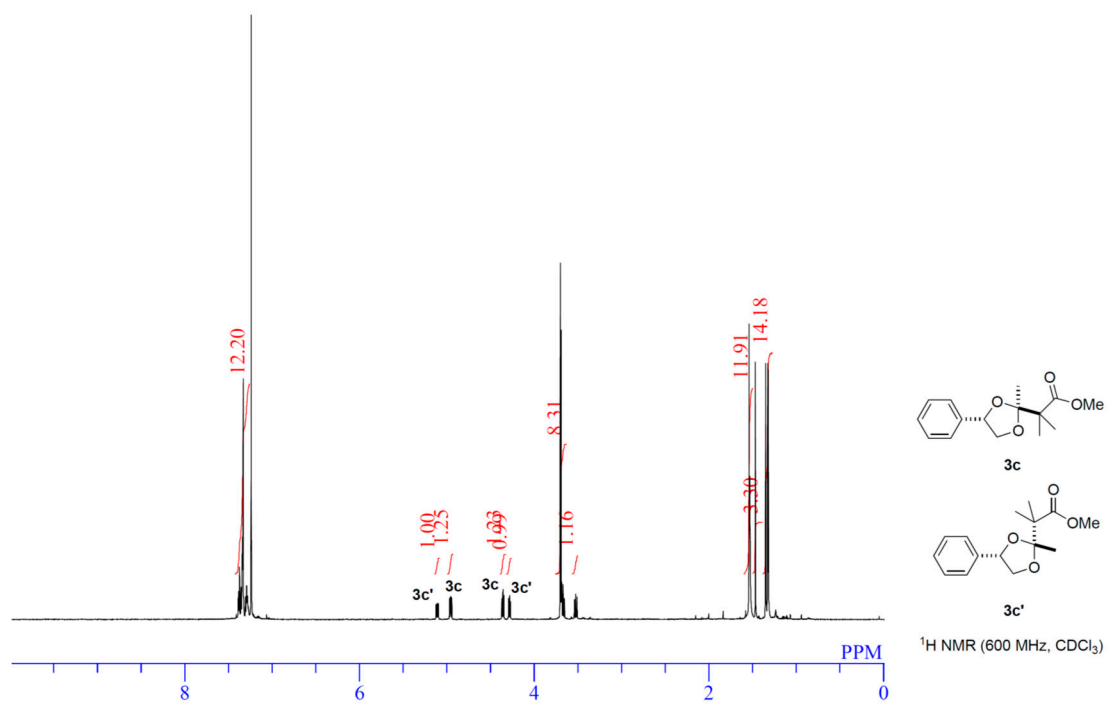

Figure S9. Proton NMR of 3c and 3c'.

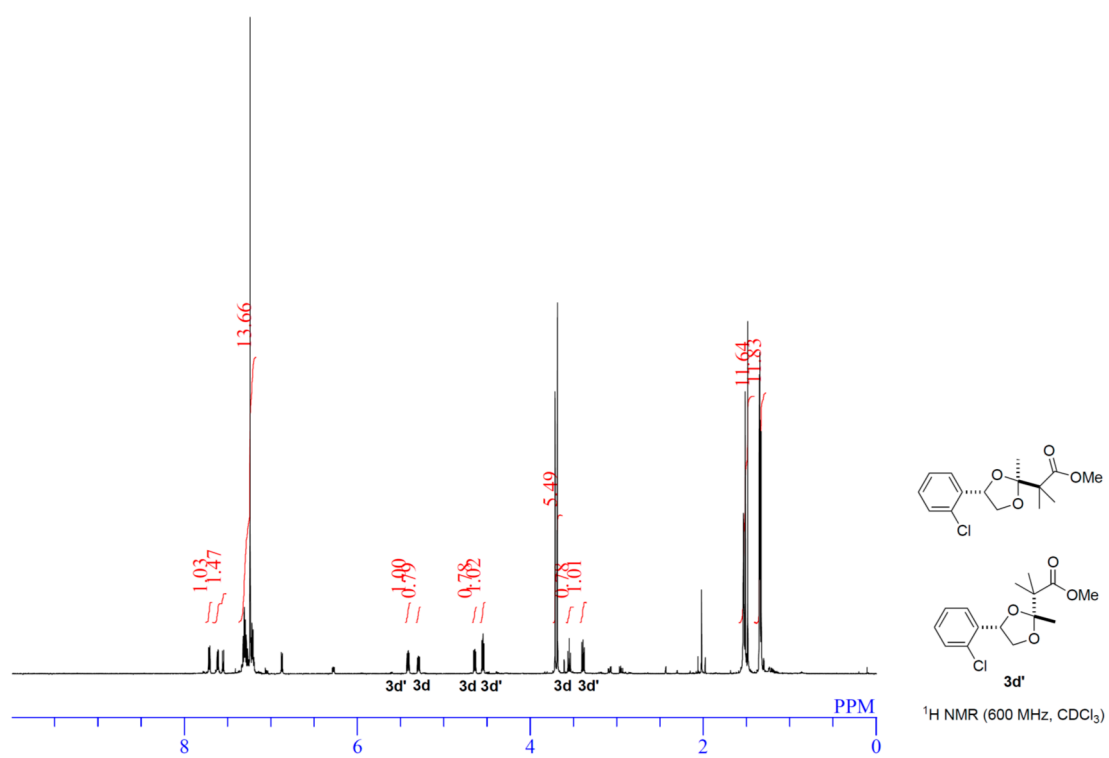

Figure S10. Proton NMR of 3d and 3d'.

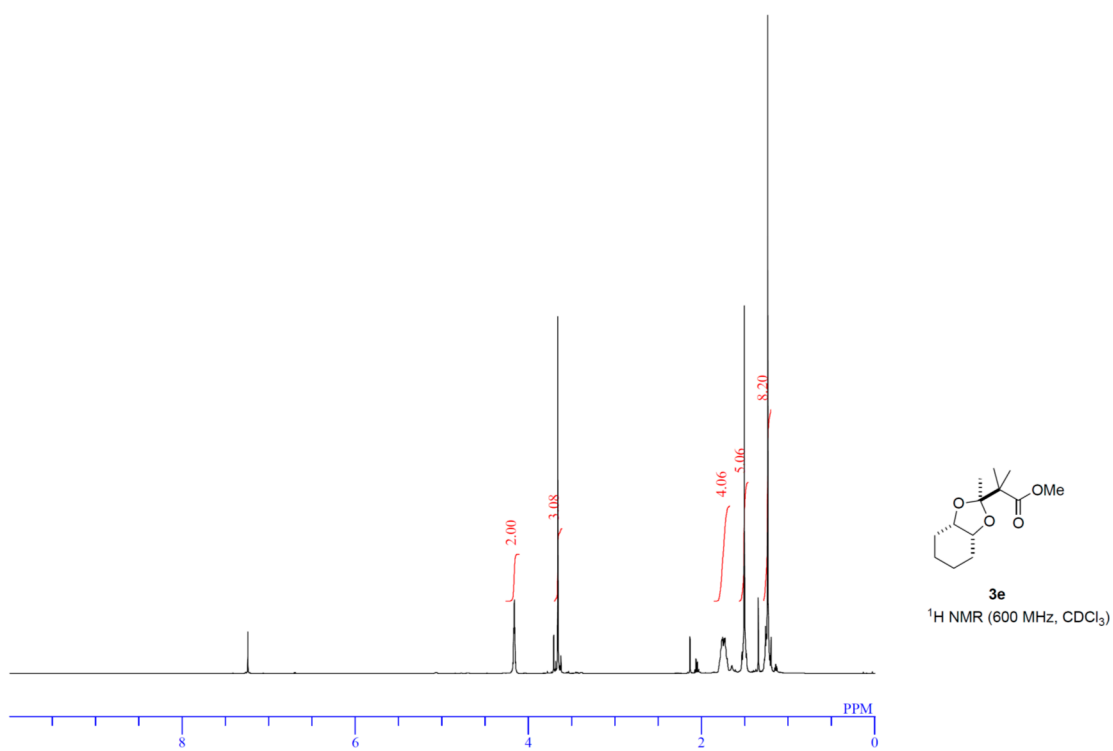Figure S11. Proton NMR of **3e**.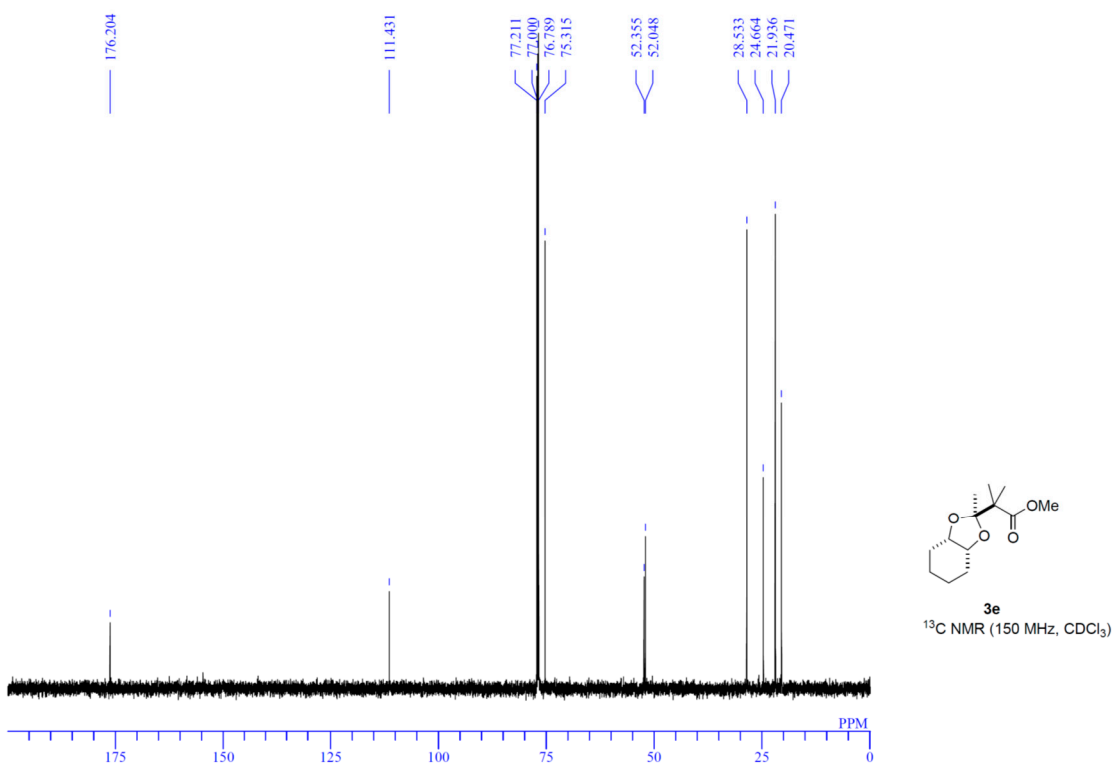Figure S12. Carbon-13 NMR of **3e**.

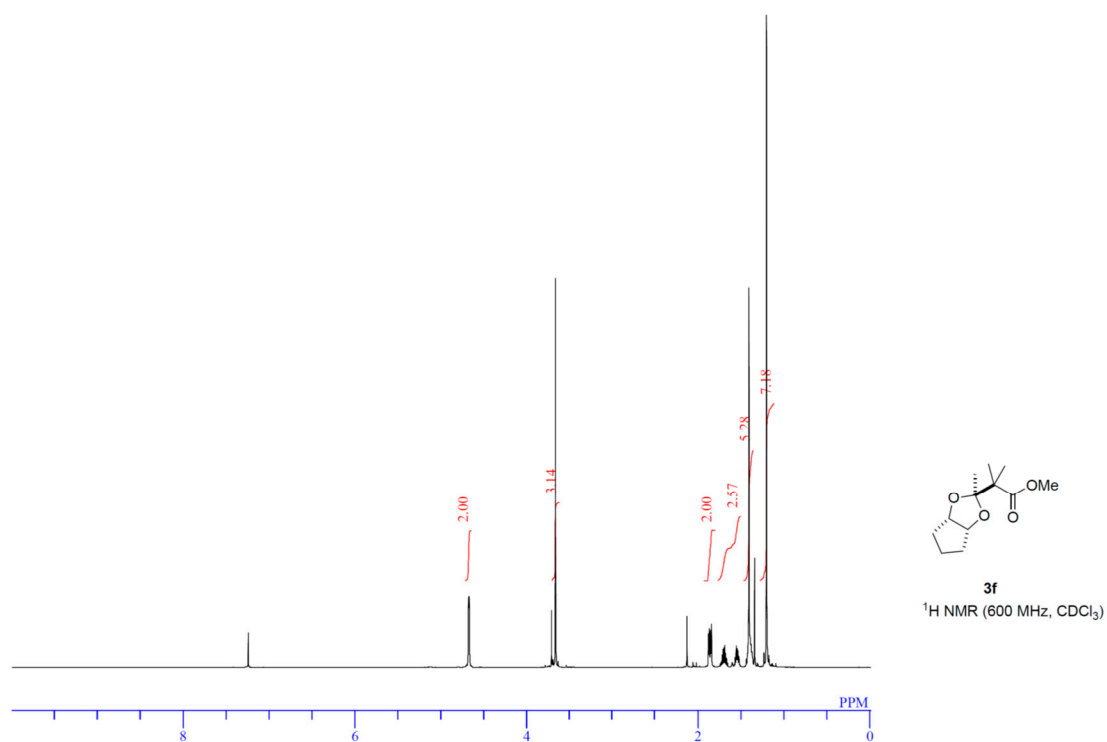Figure S13. Proton NMR of **3f**.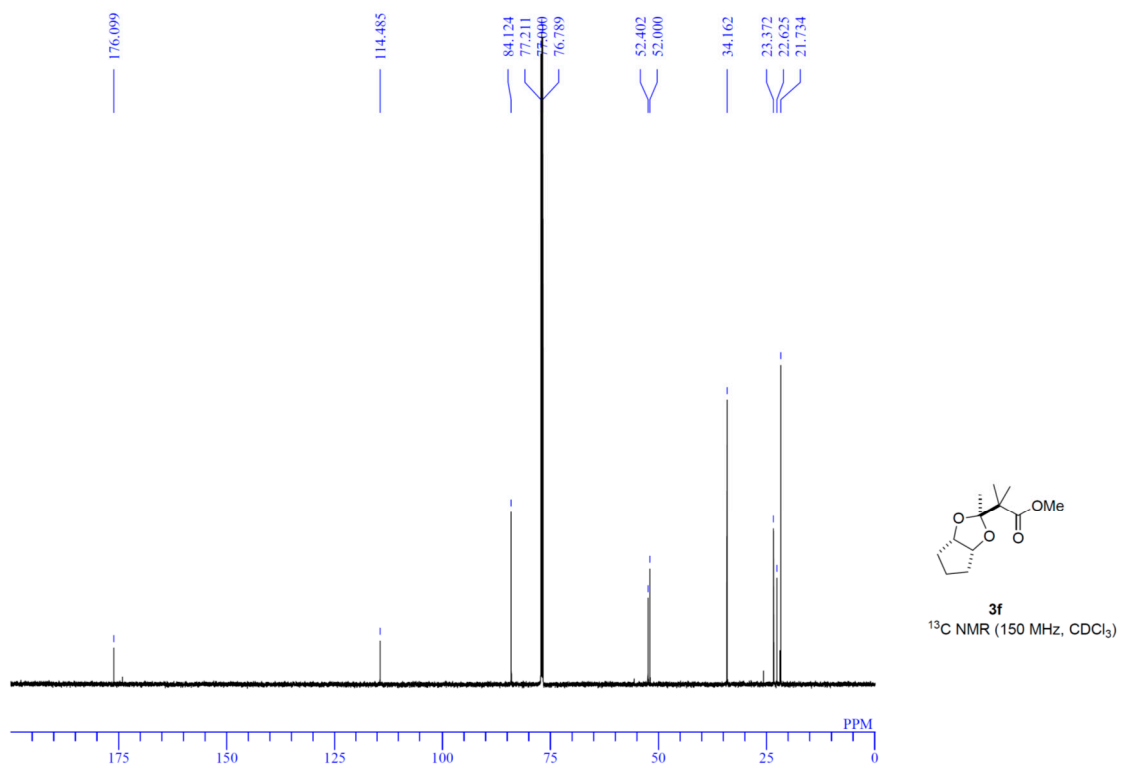Figure S14. Carbon-13 NMR of **3f**.

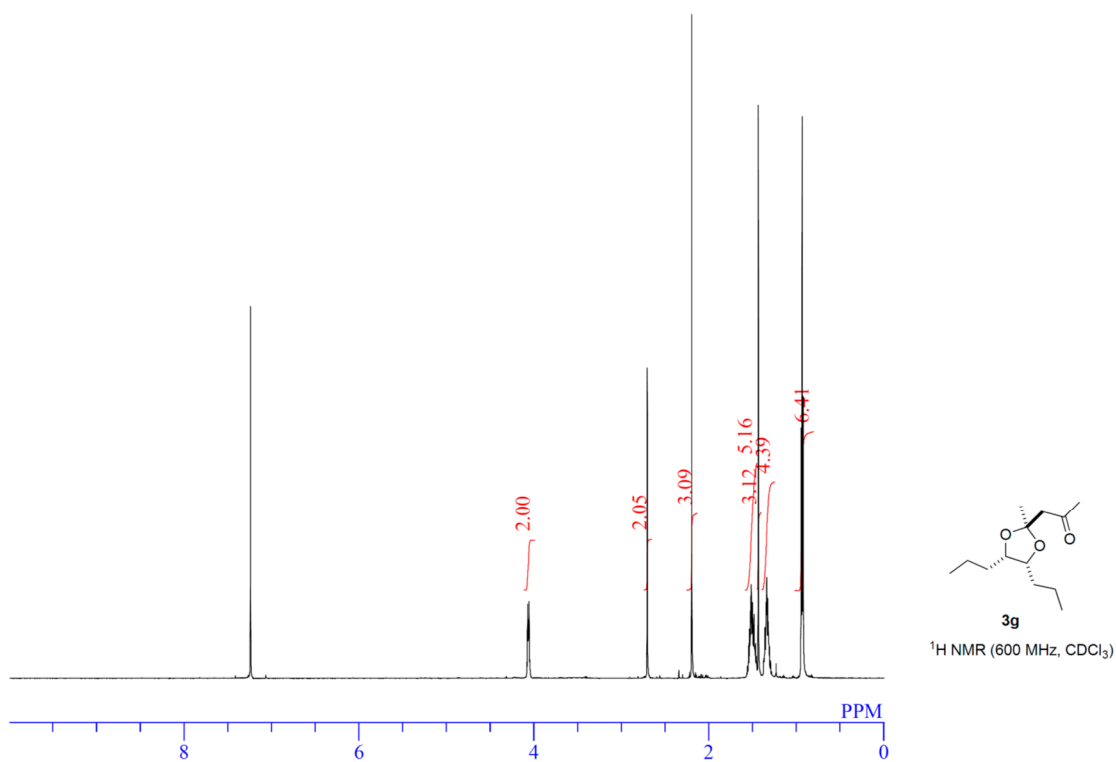Figure S15. Proton NMR of **3g**.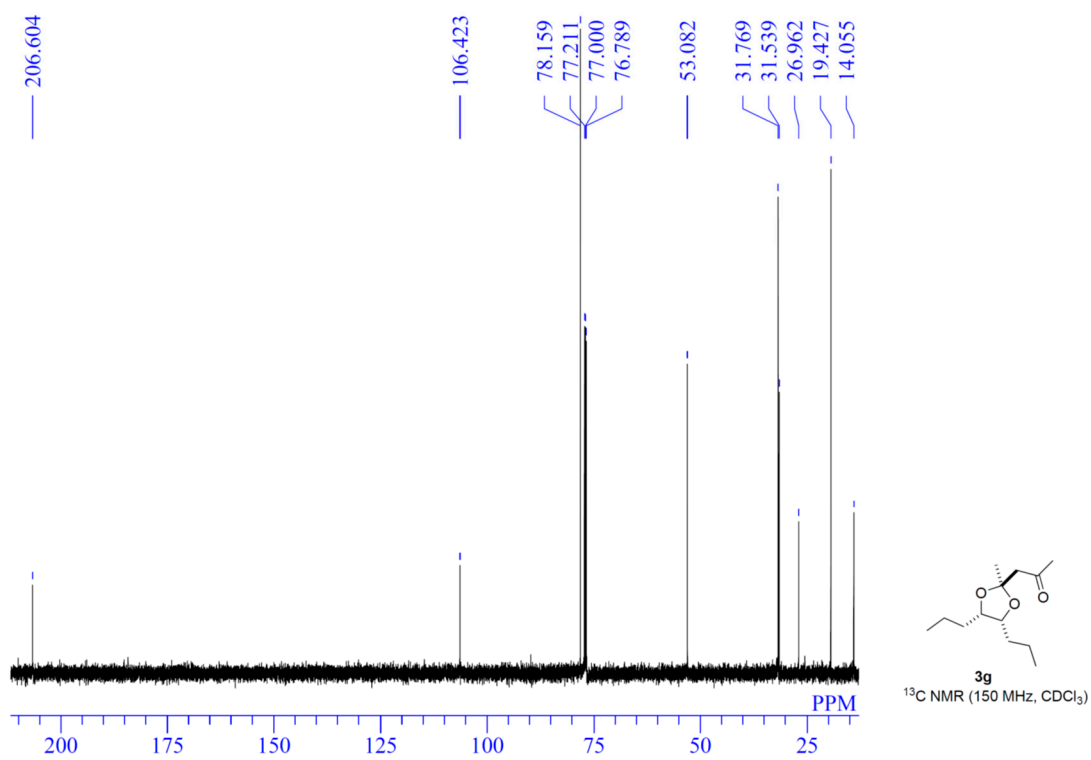Figure S16. Carbon-13 NMR of **3g**.



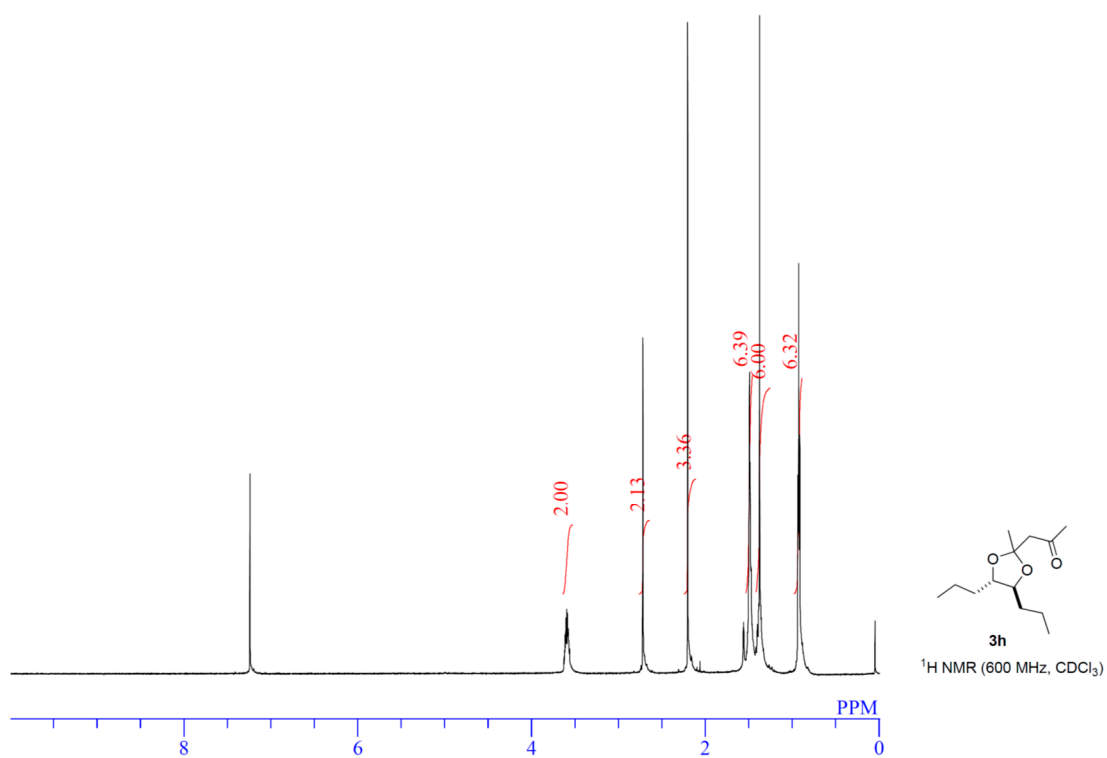Figure S17. Proton NMR of **3h**.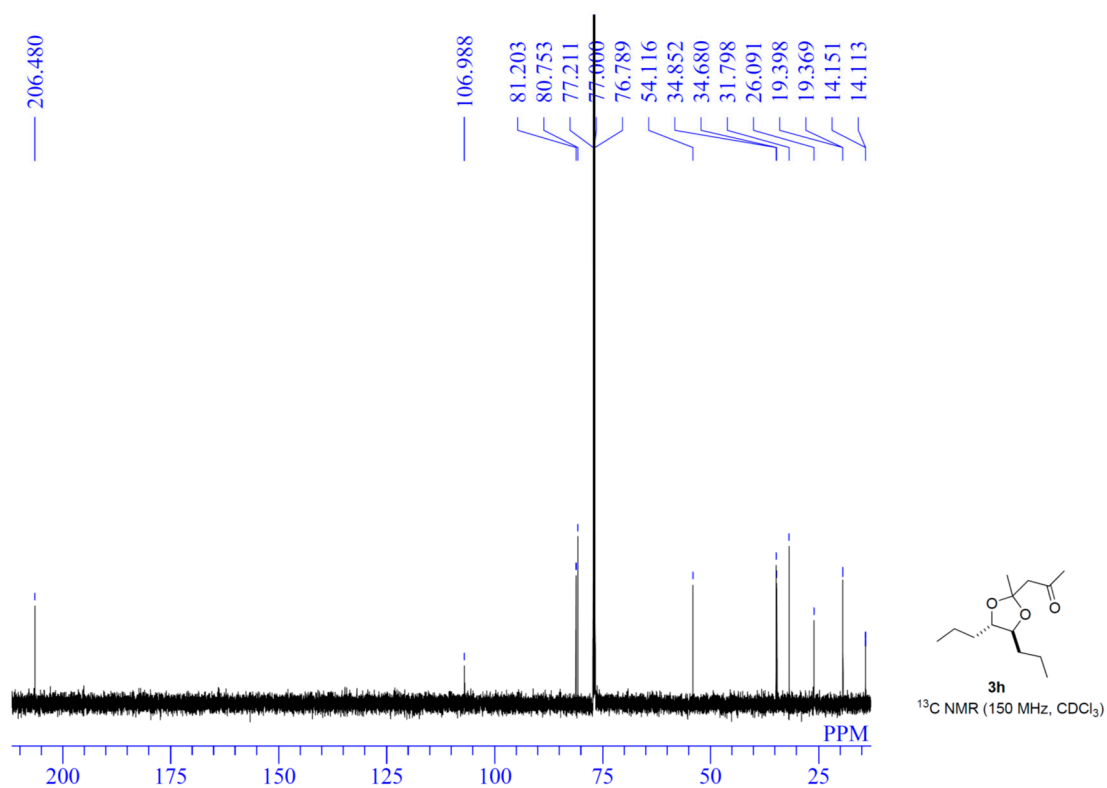Figure S18. Carbon-13 NMR of **3h**.

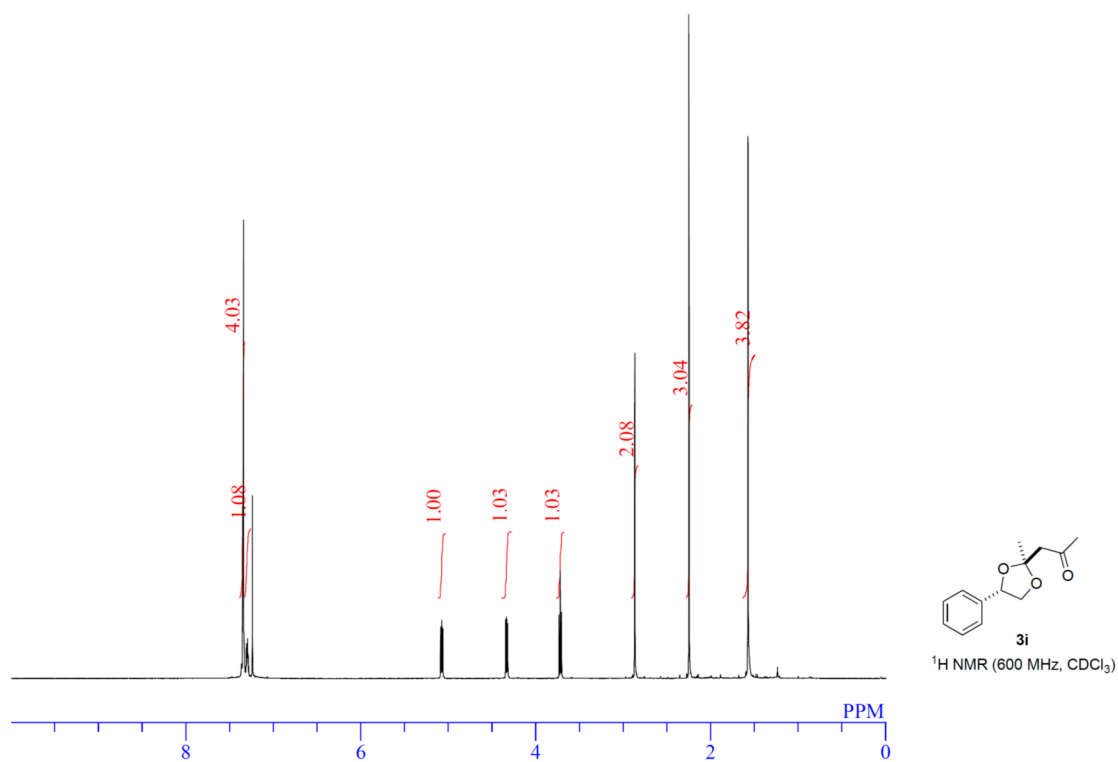Figure S19. Proton NMR of **3i**.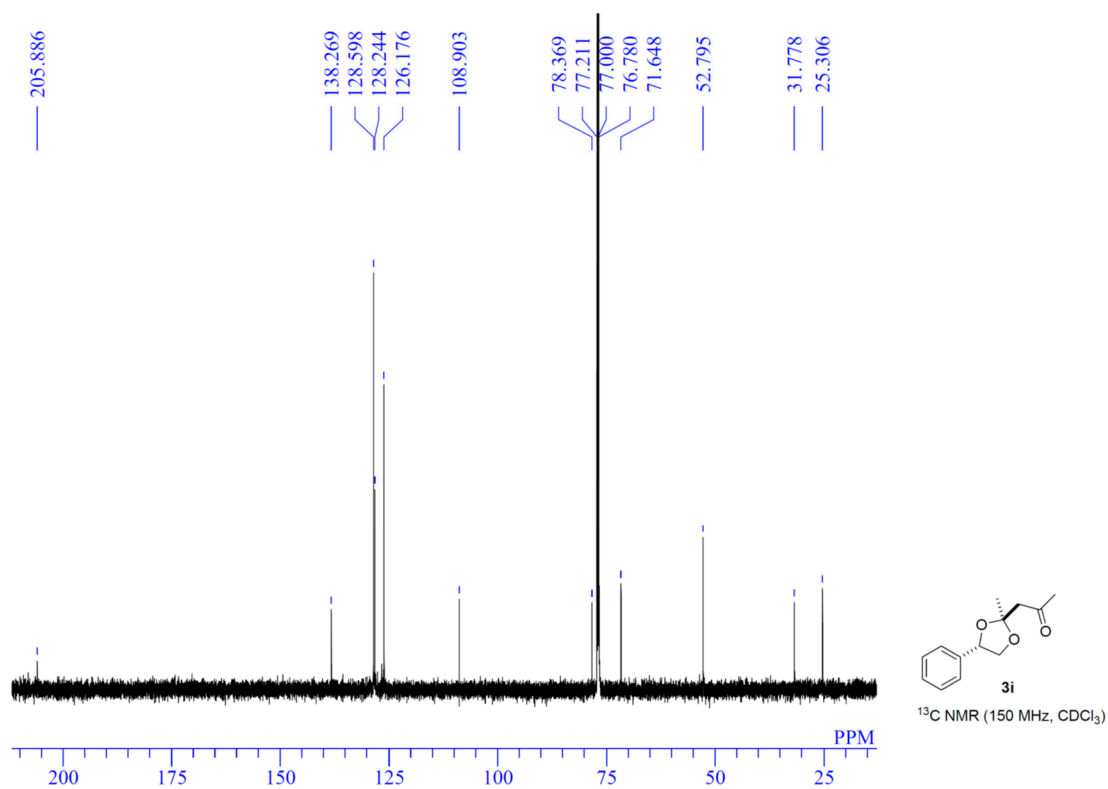Figure S20. Carbon-13 NMR of **3i**.

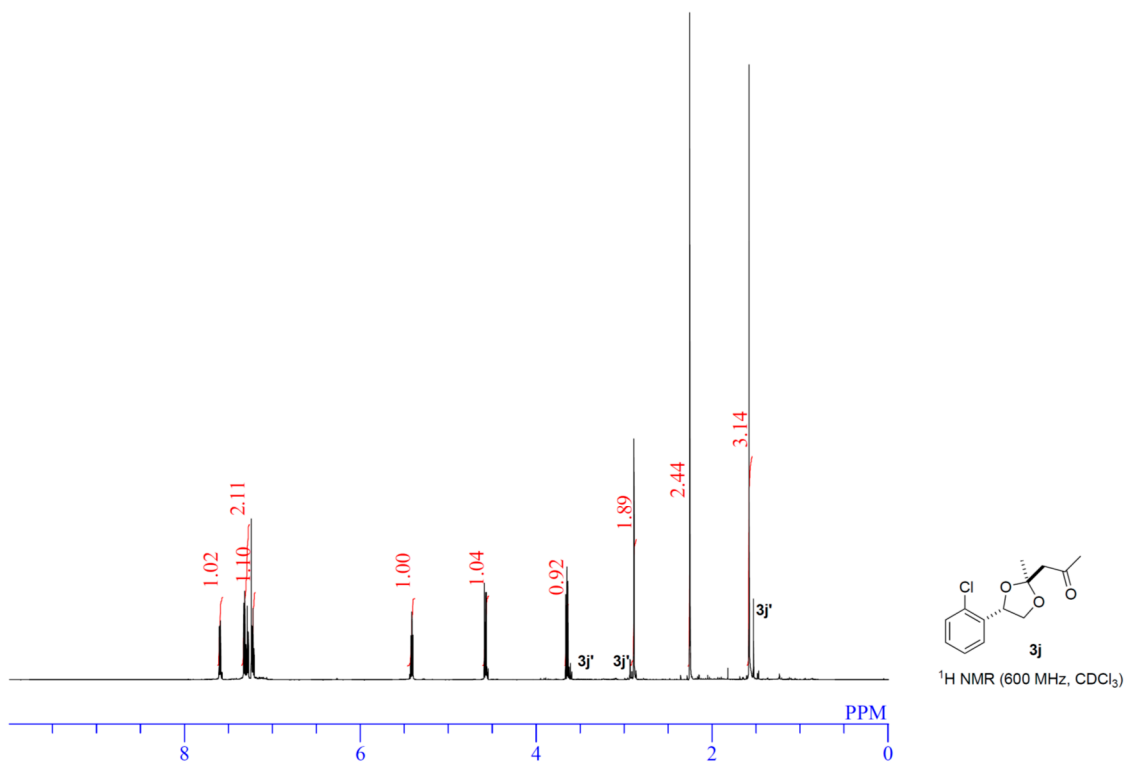

Figure S21. Proton NMR of 3j.

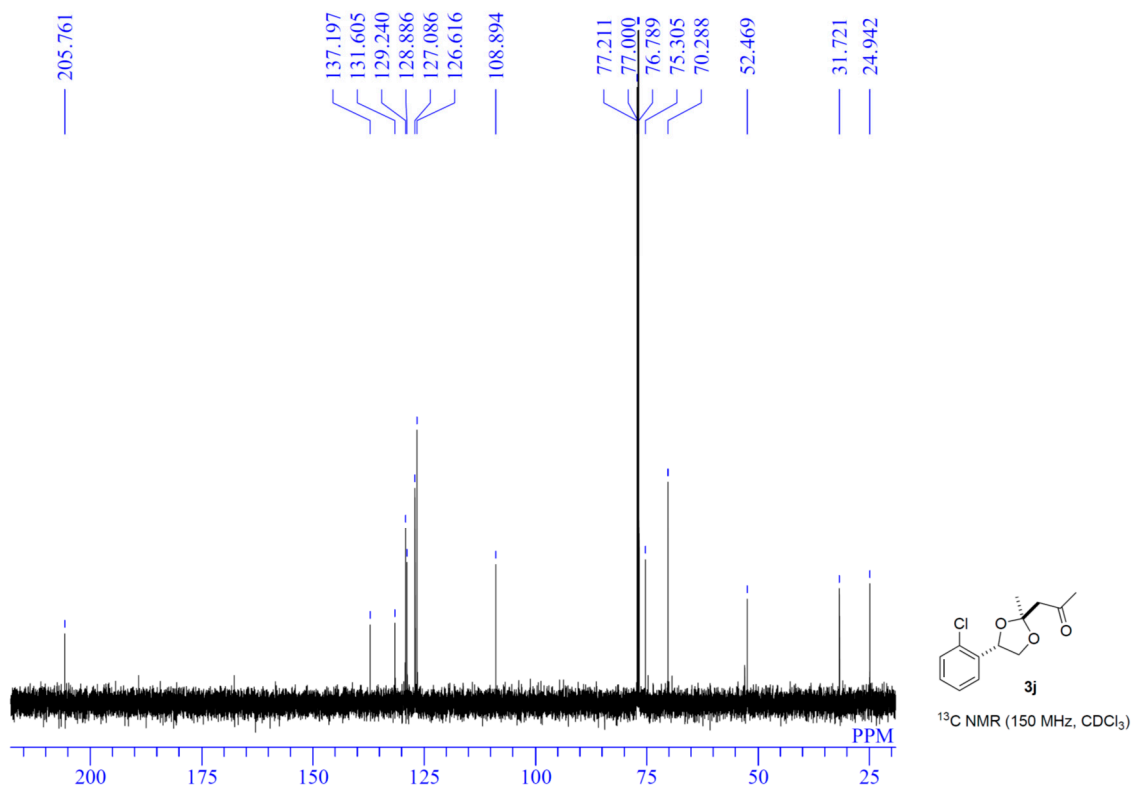

Figure S22. Carbon-13 NMR of 3j.

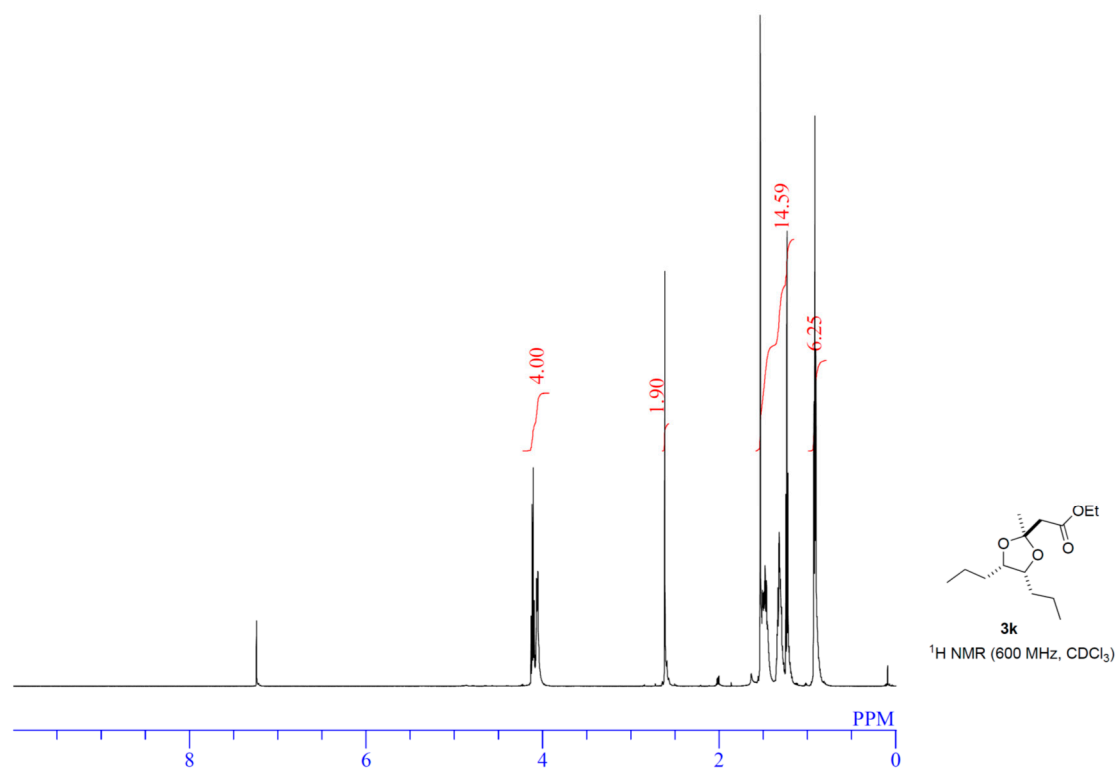Figure S23. Proton NMR of **3k**.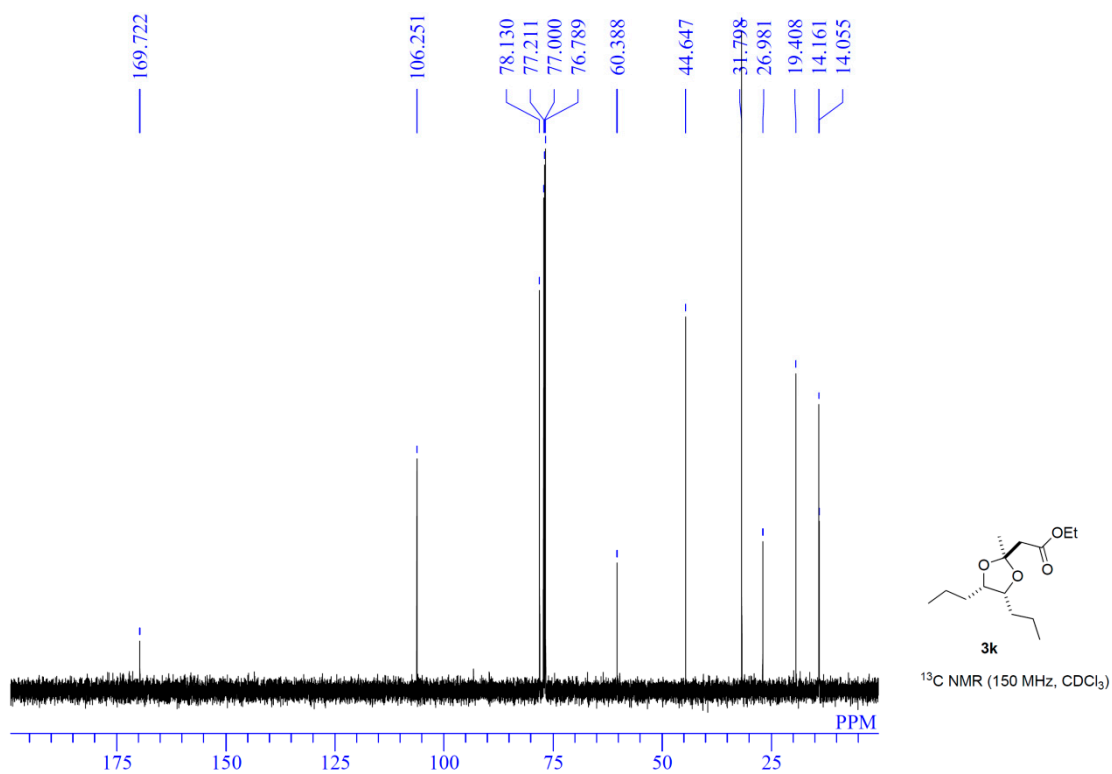Figure S24. Carbon-13 NMR of **3k**.

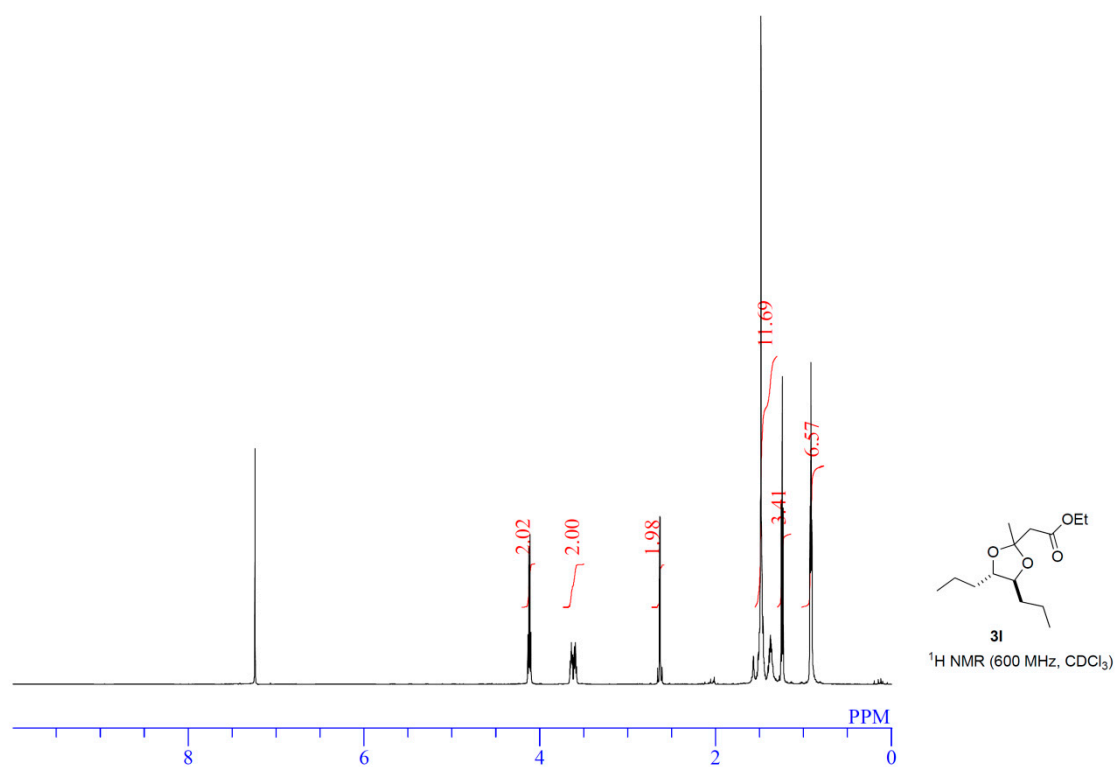Figure S25. Proton NMR of **31**.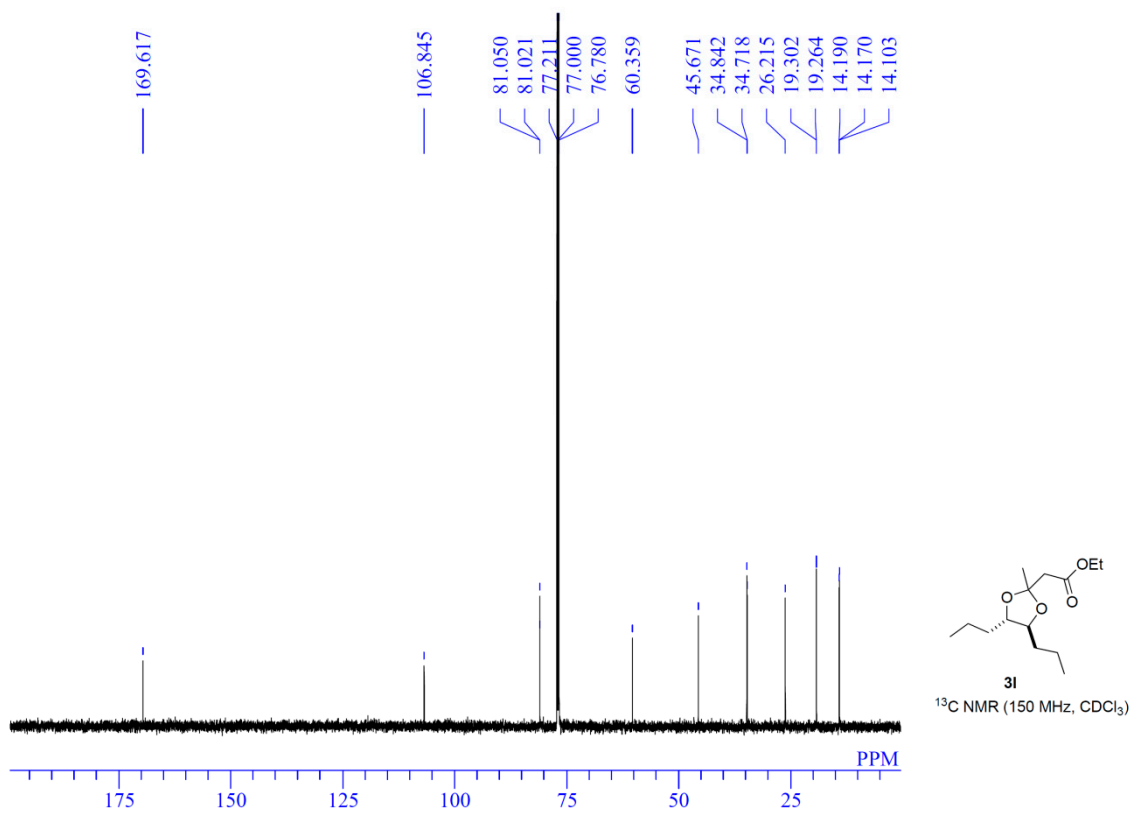Figure S26. Carbon-13 NMR of **31**.

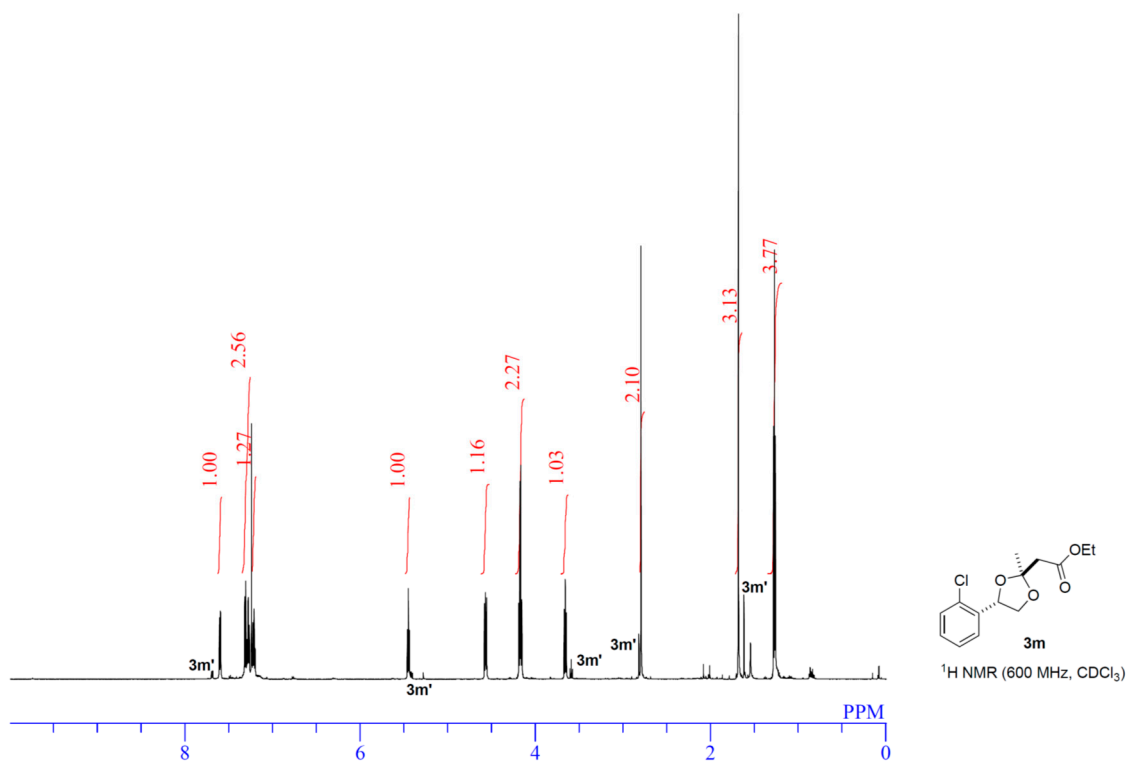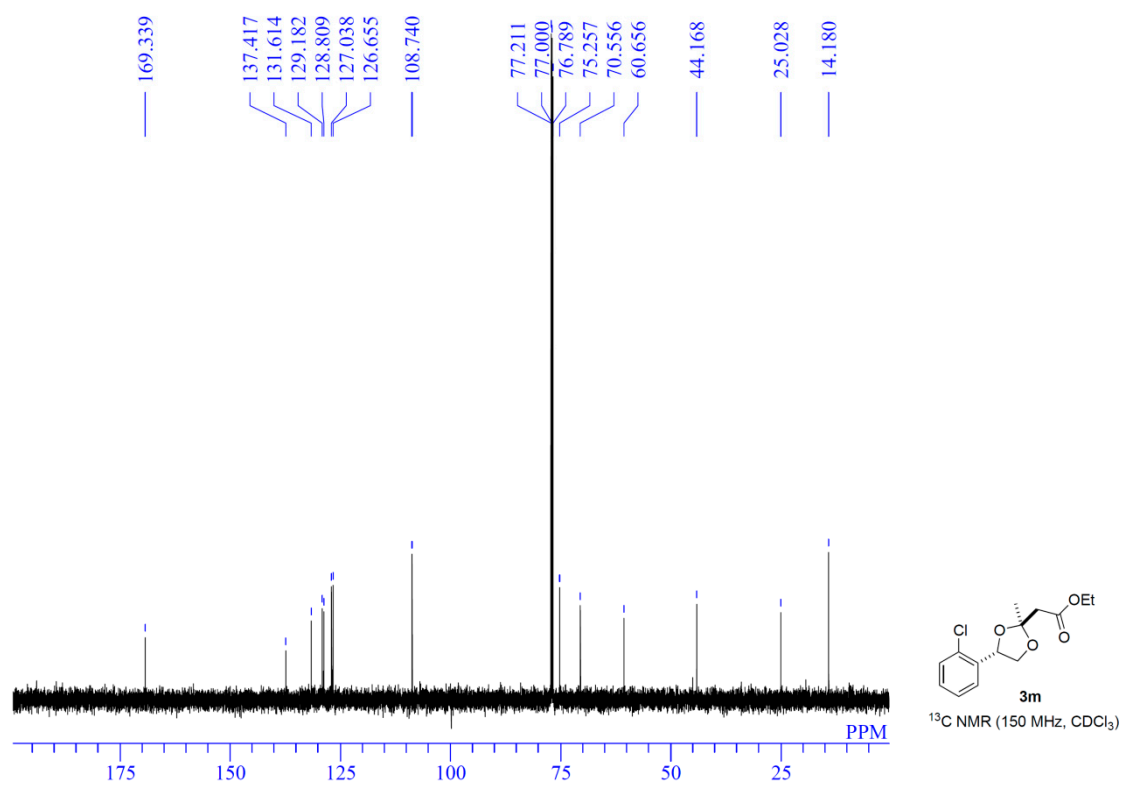

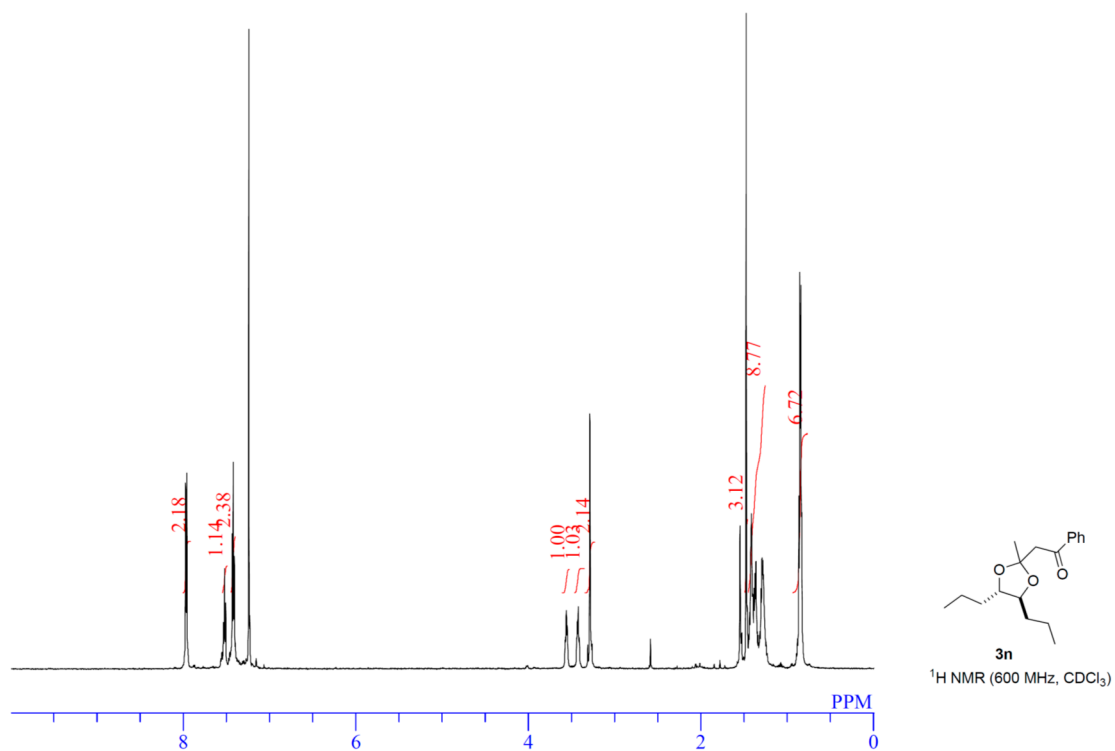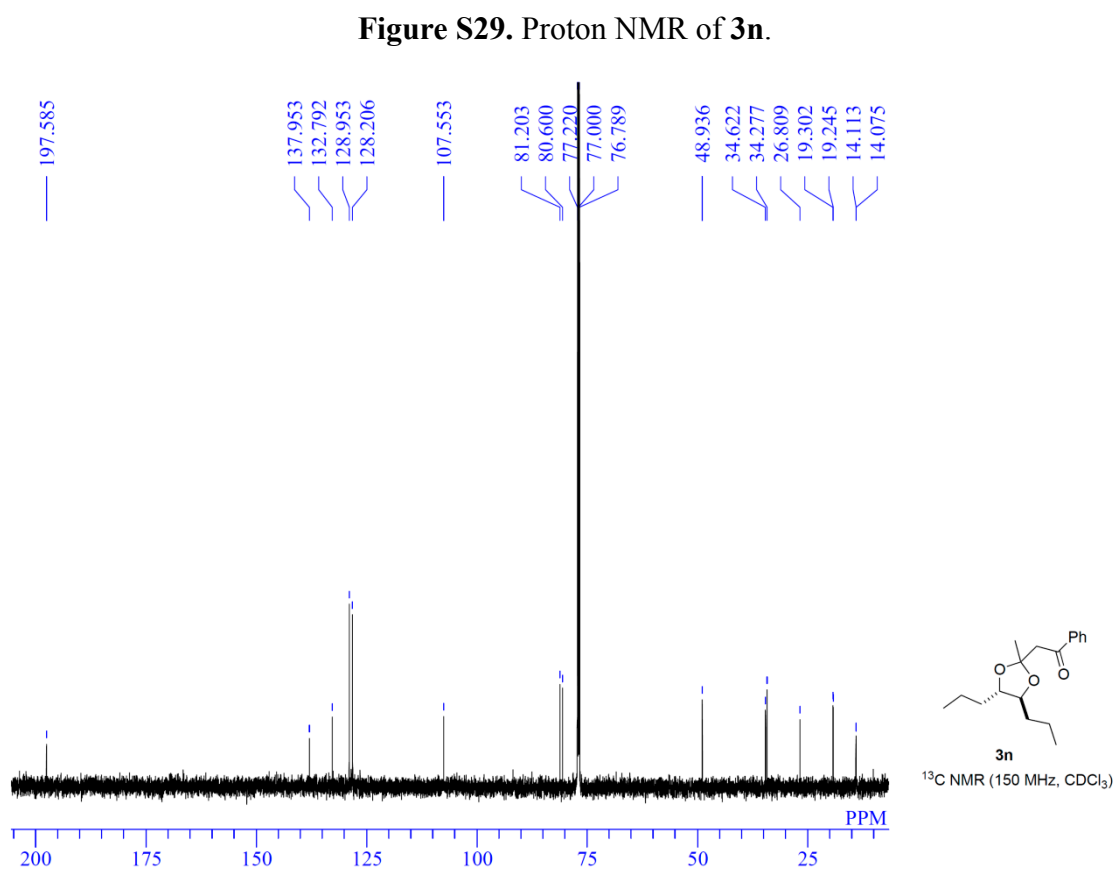

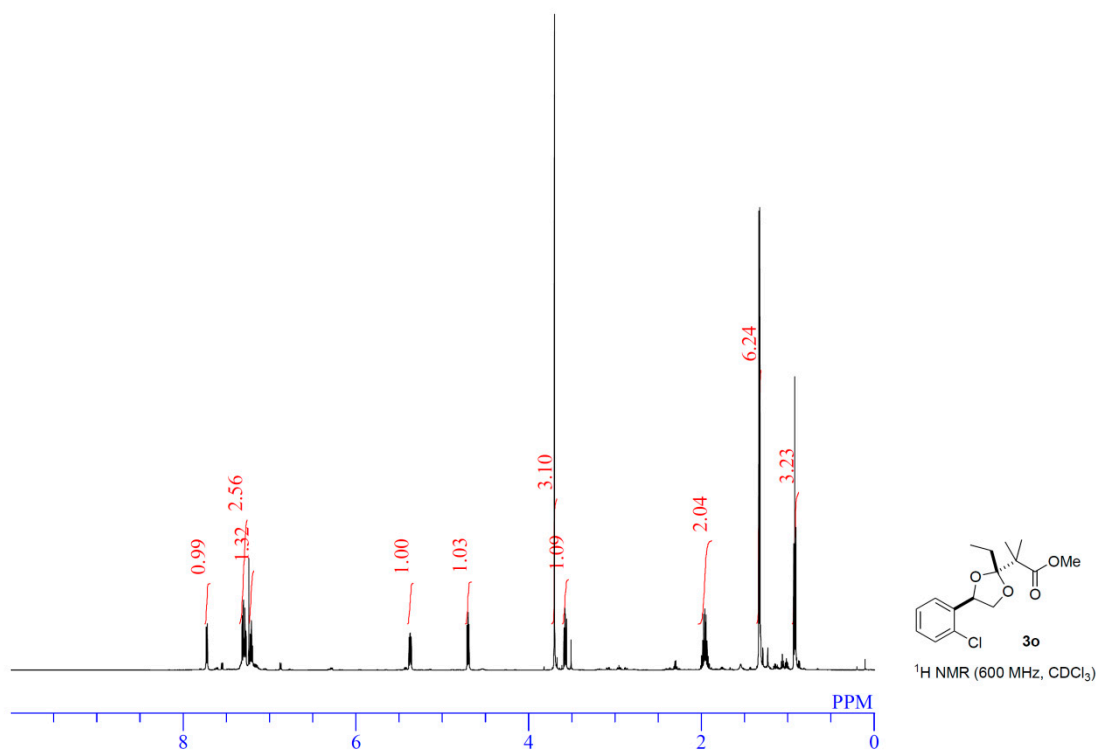Figure S31. Proton NMR of **3o**.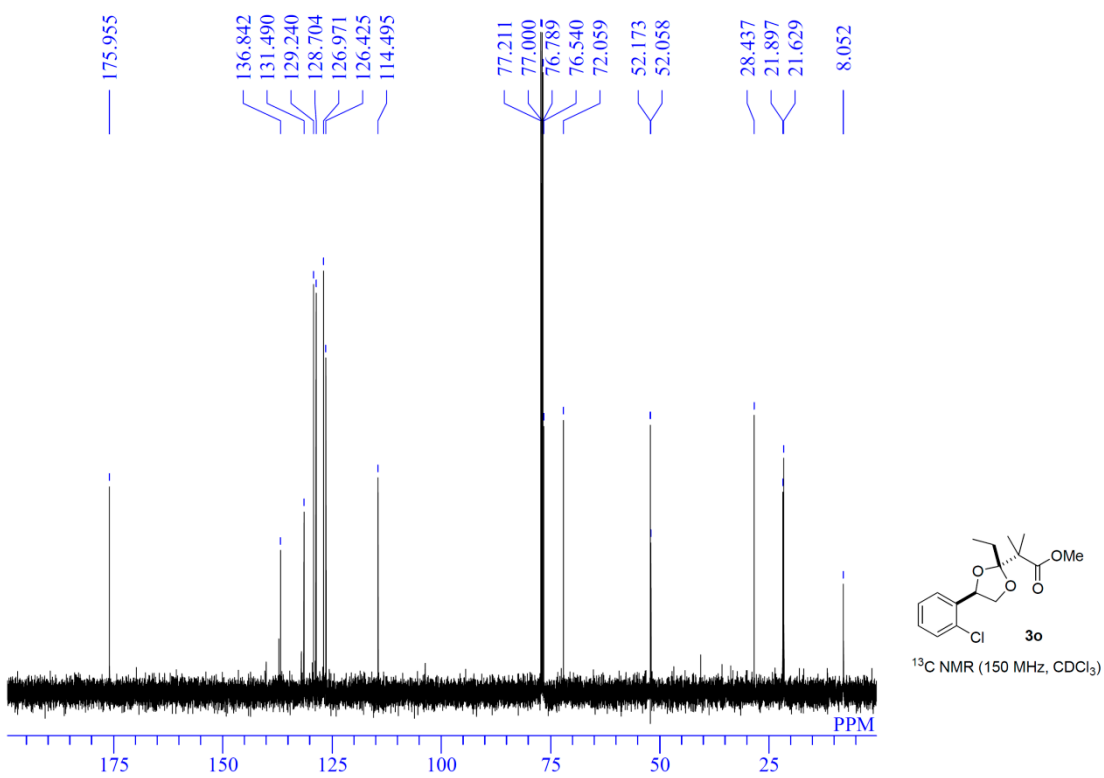Figure S32. Carbon-13 NMR of **3o**.



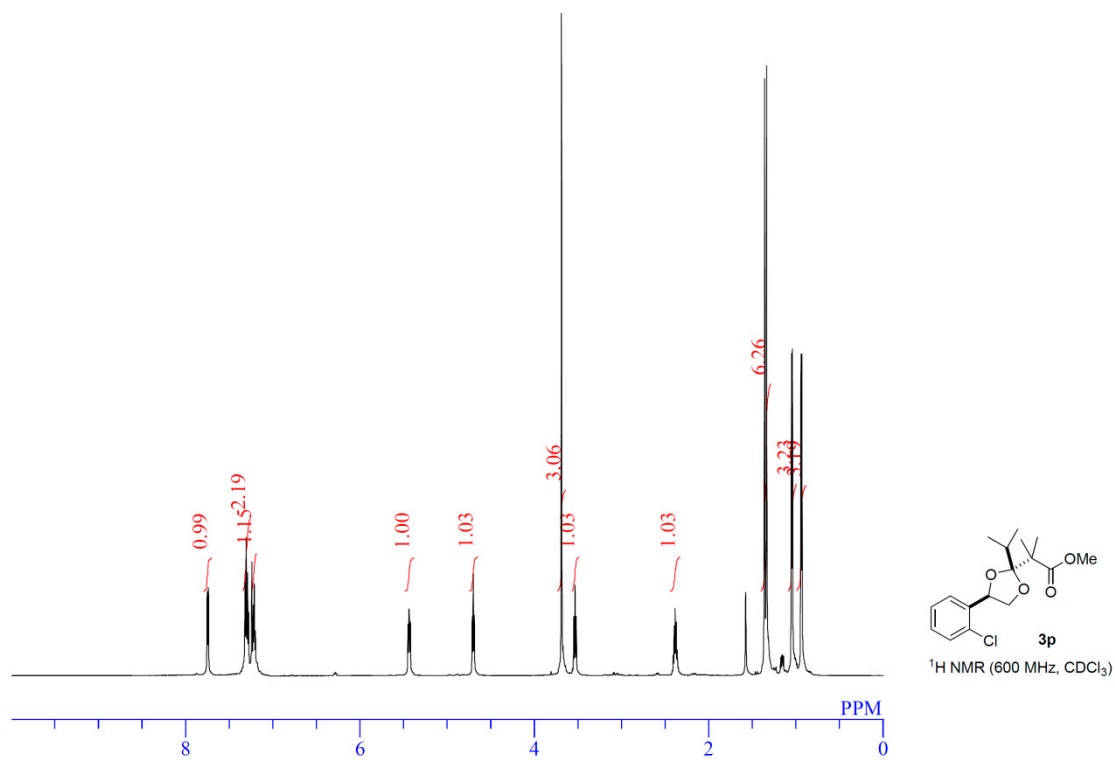

**Figure S33. Proton NMR of 3p.**

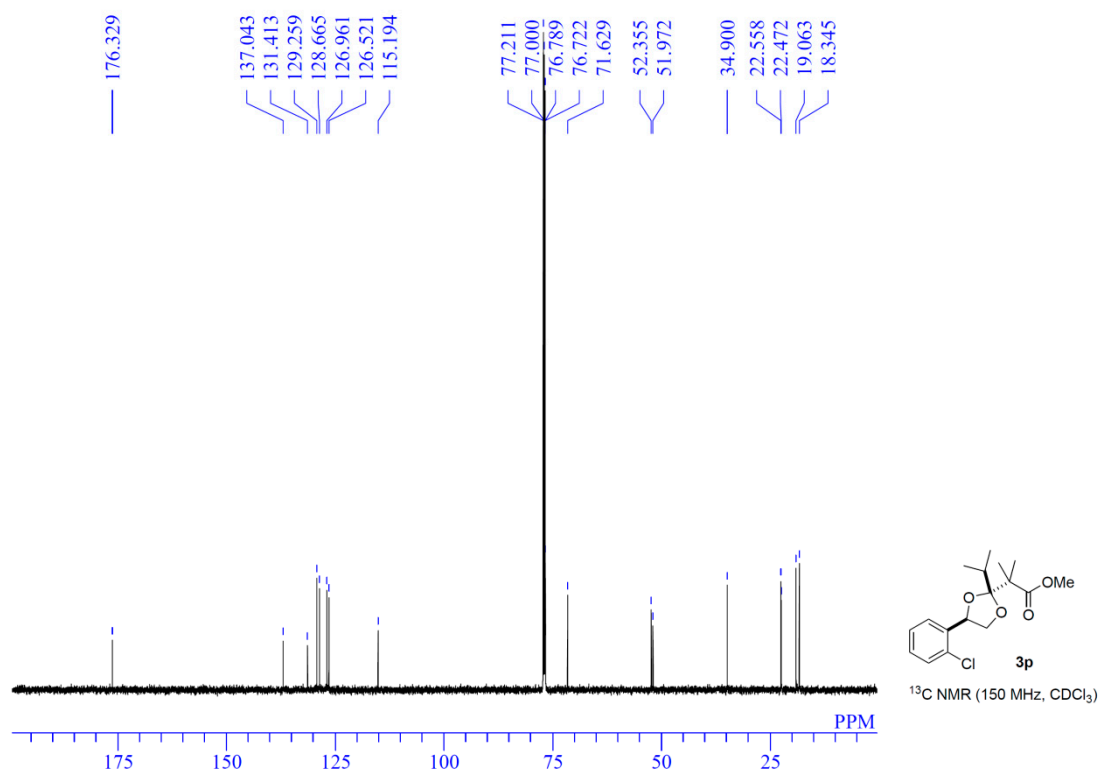

**Figure S34. Carbon-13 NMR of 3p.**

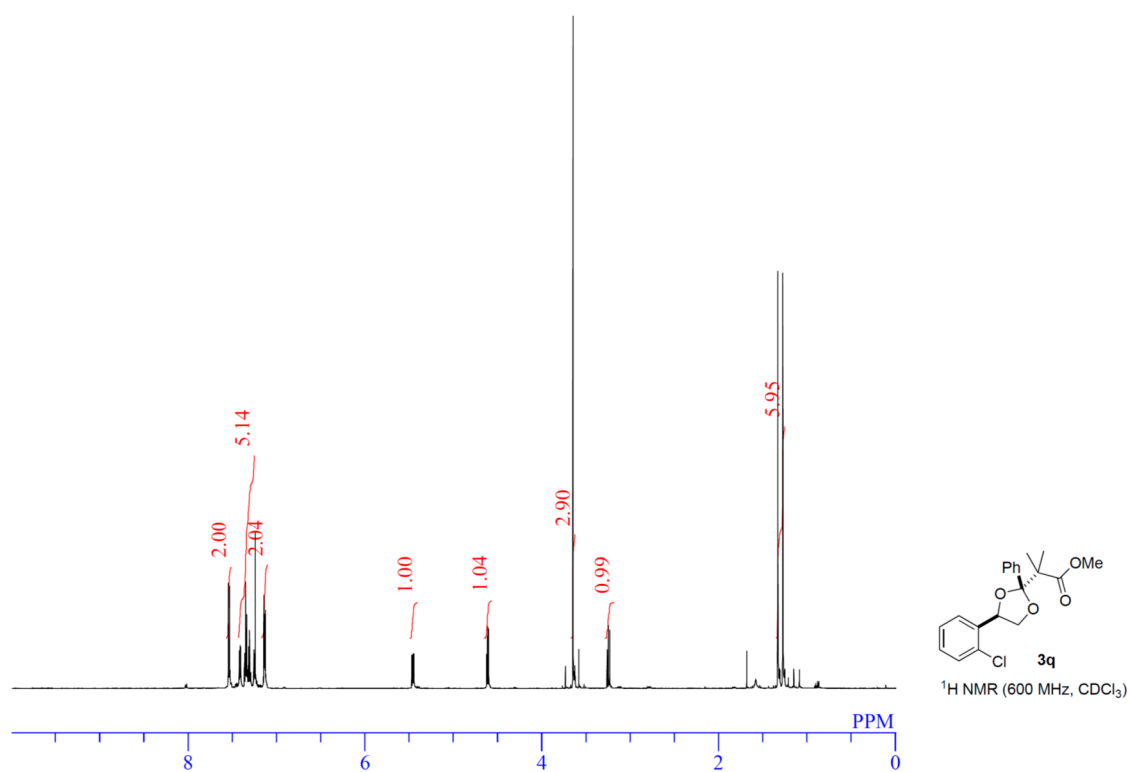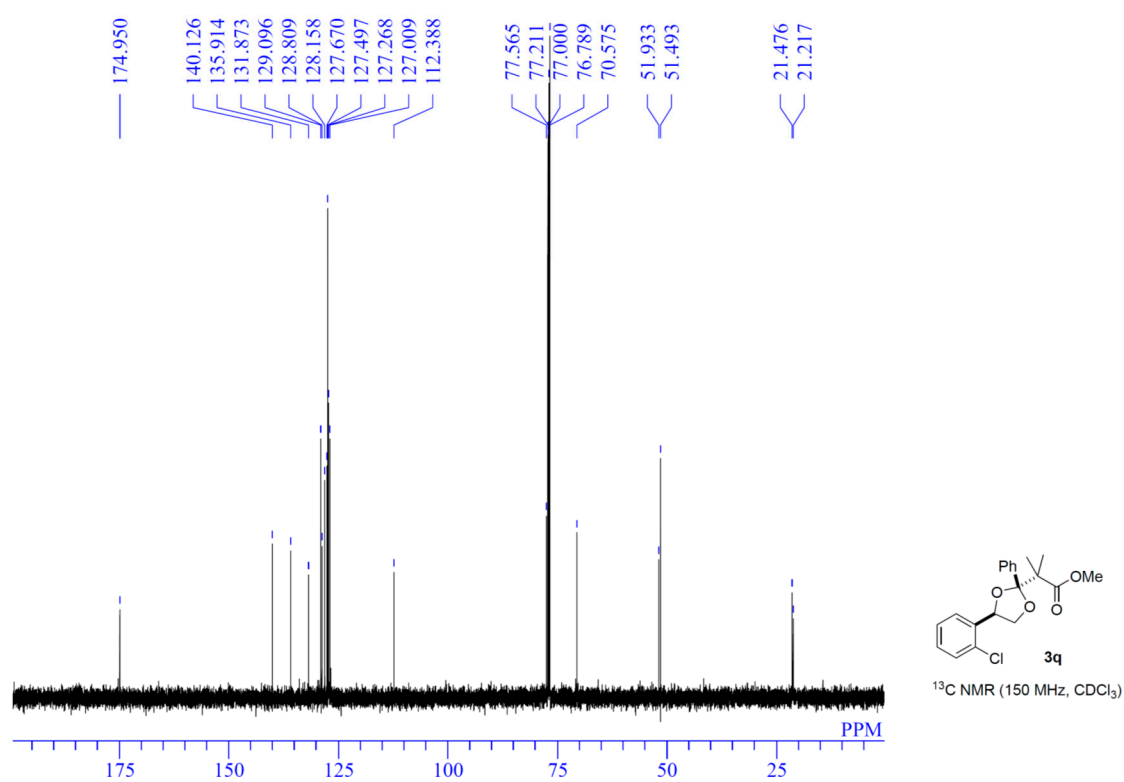

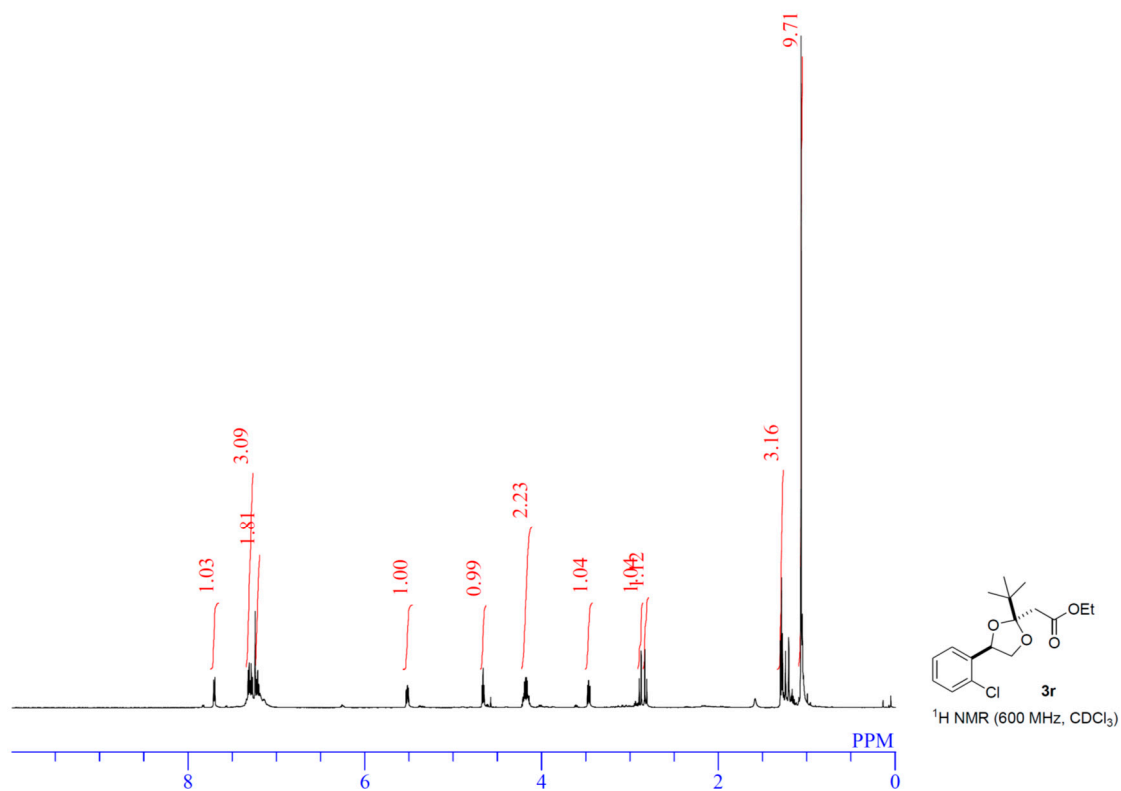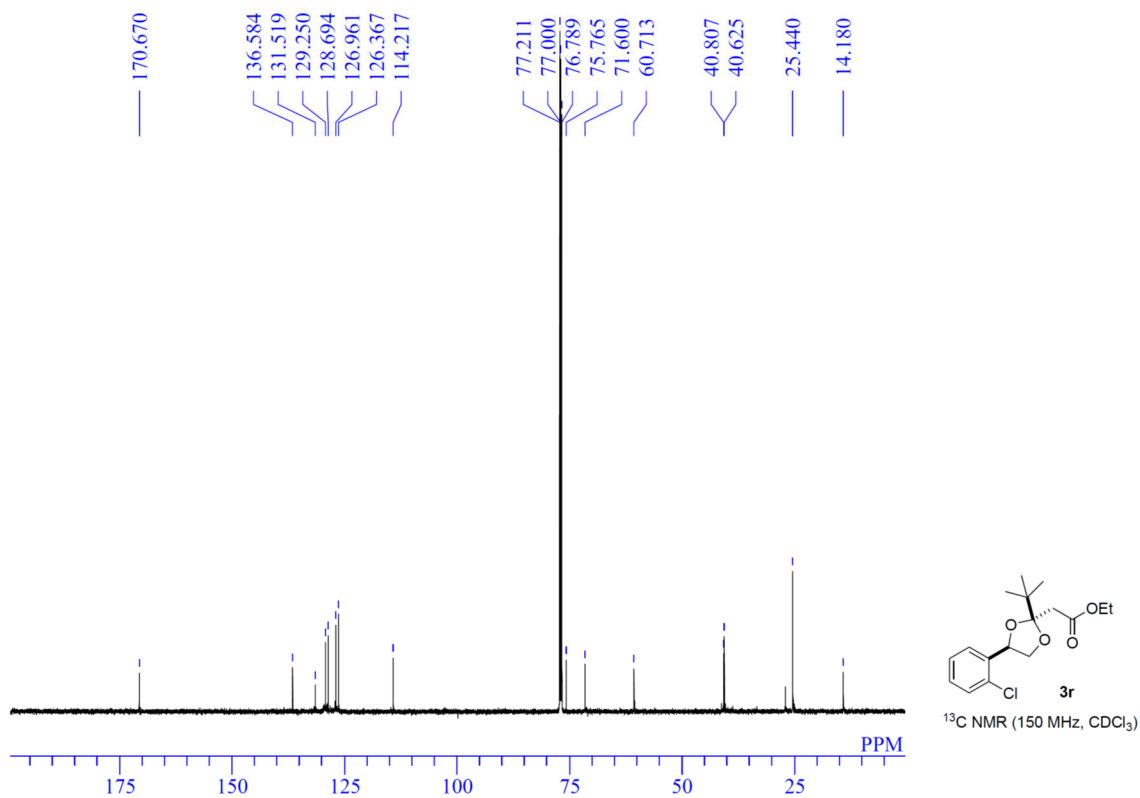

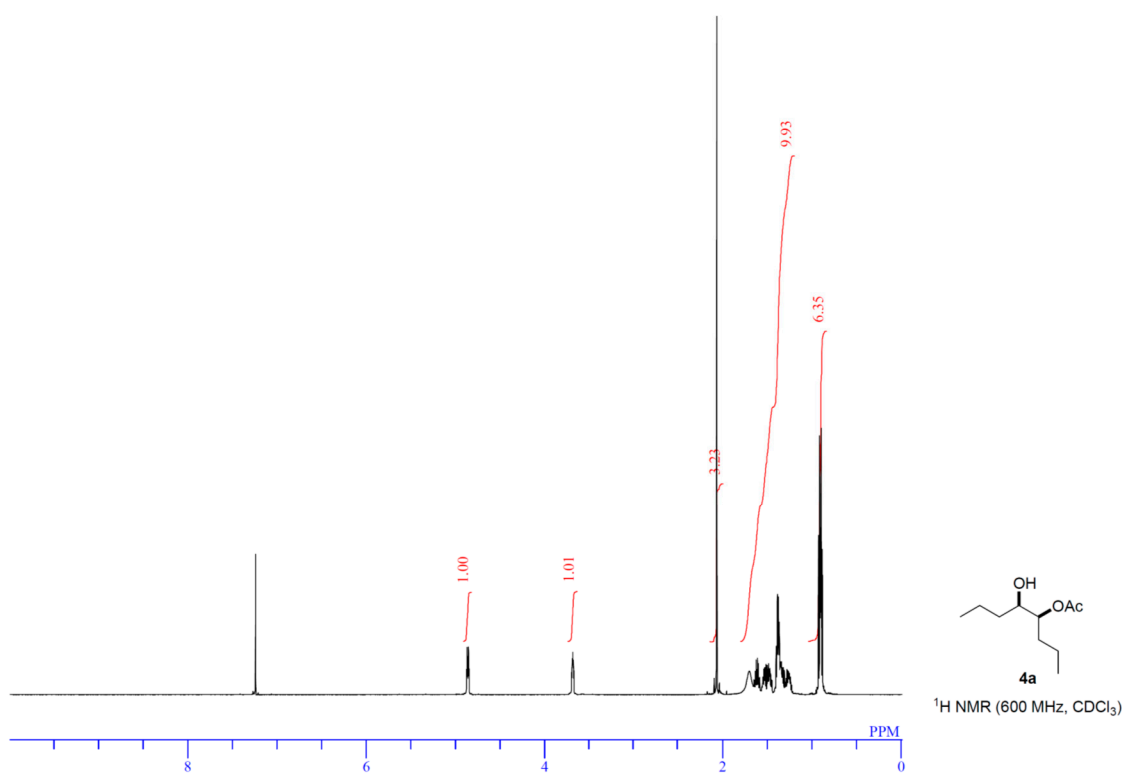

Figure S39. Proton NMR of 4a.

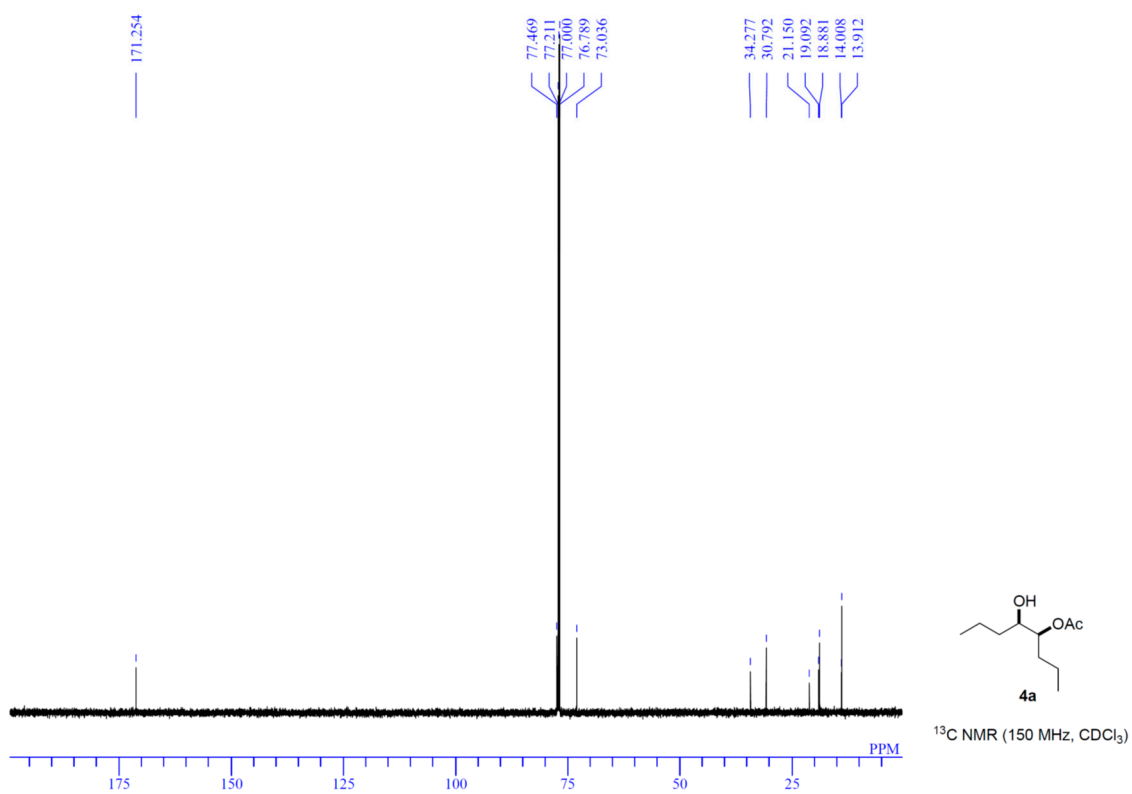

Figure S40. Carbon-13 NMR of 4a.

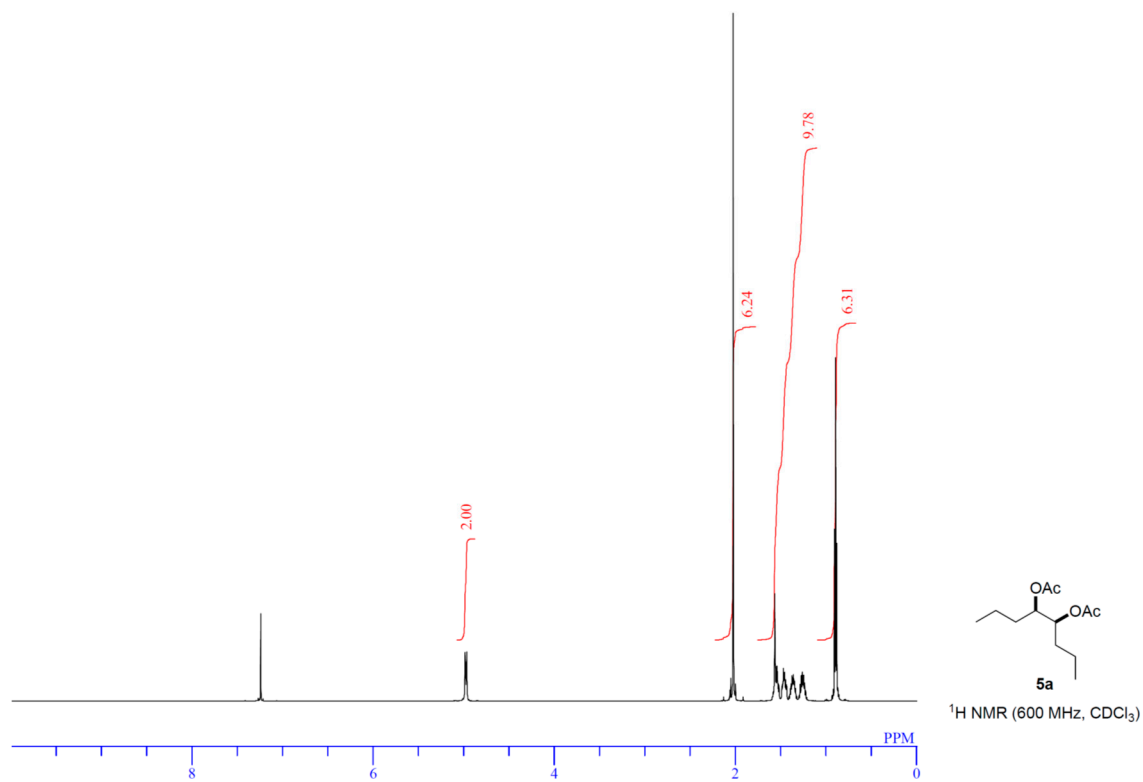Figure S41. Proton NMR of **5a**.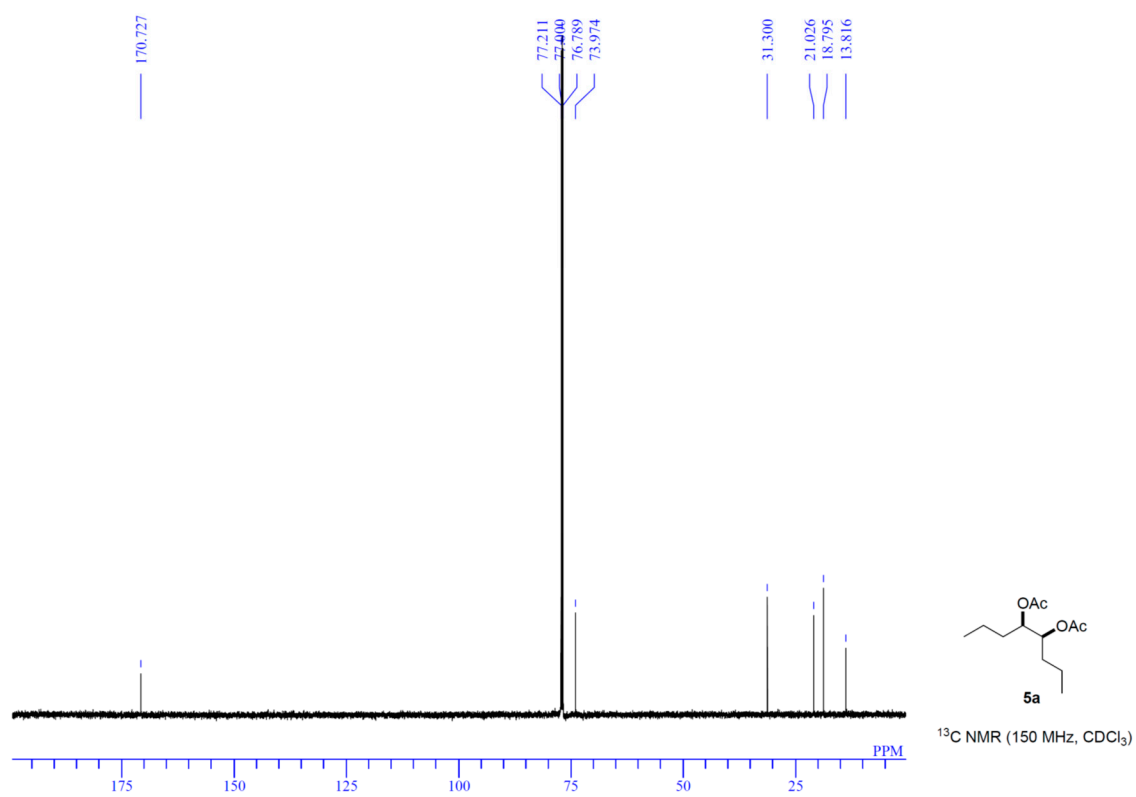Figure S42. Carbon-13 NMR of **5a**.

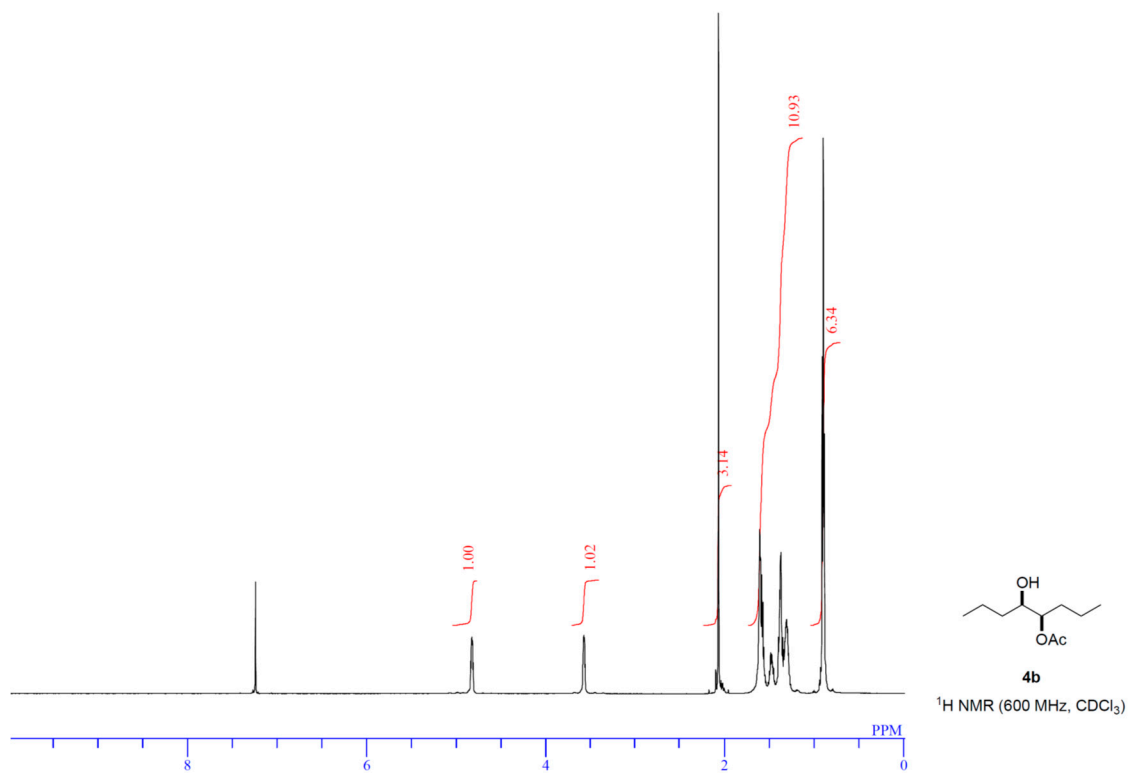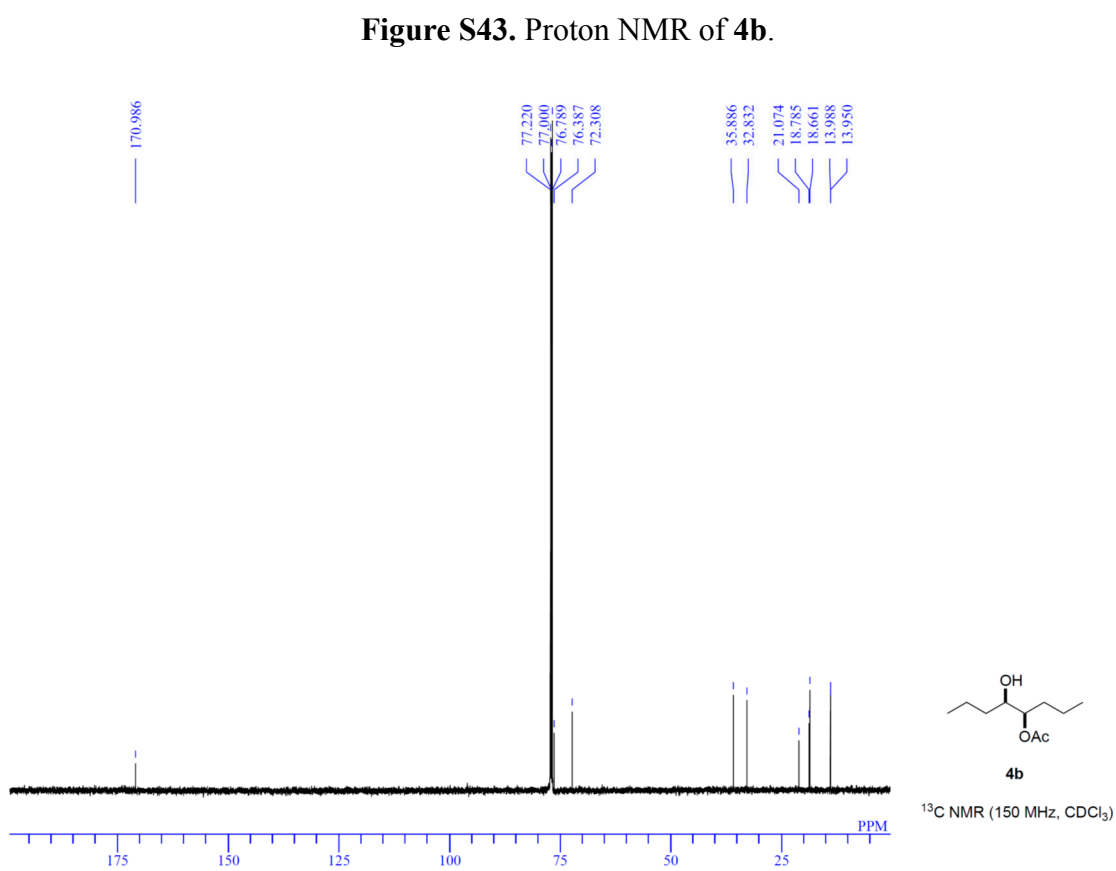

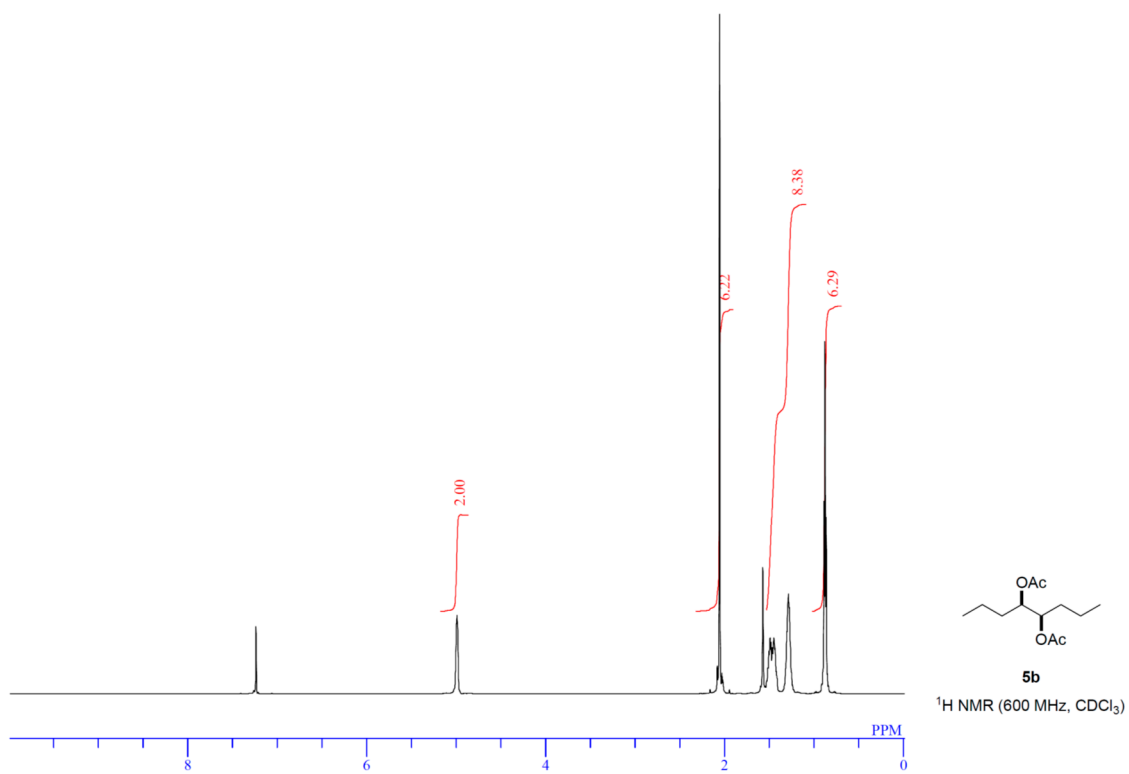Figure S45. Proton NMR of **5b**.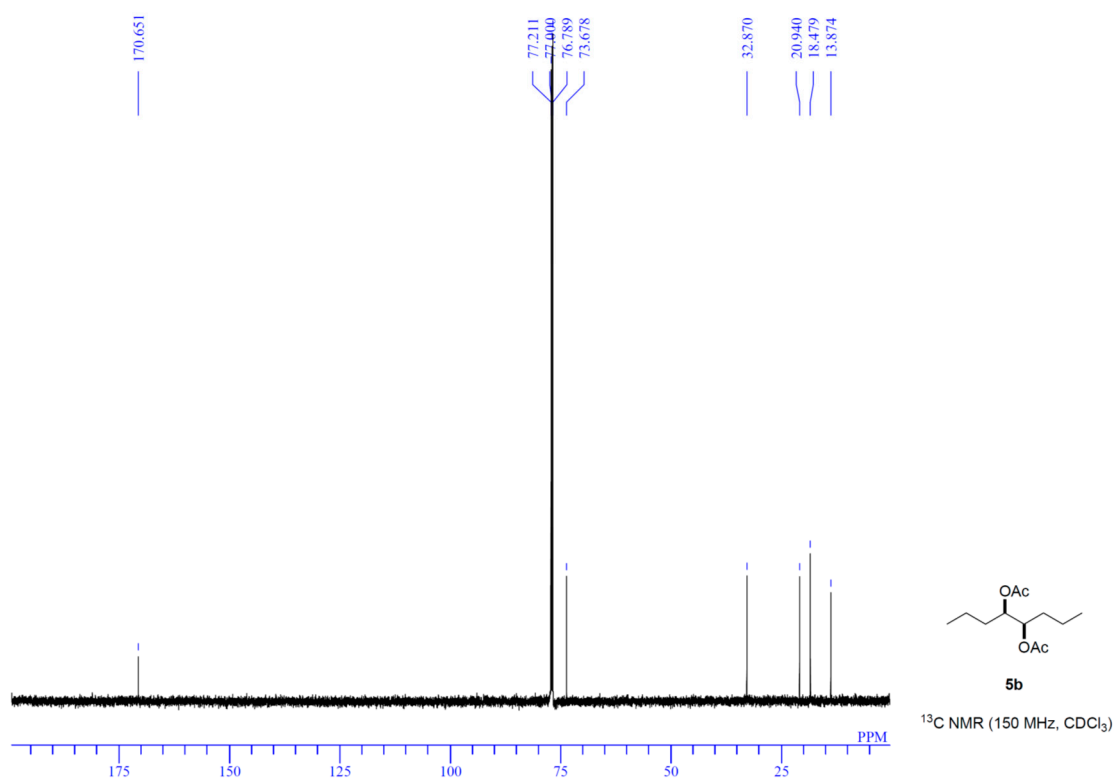Figure S46. Carbon-13 NMR of **5b**.

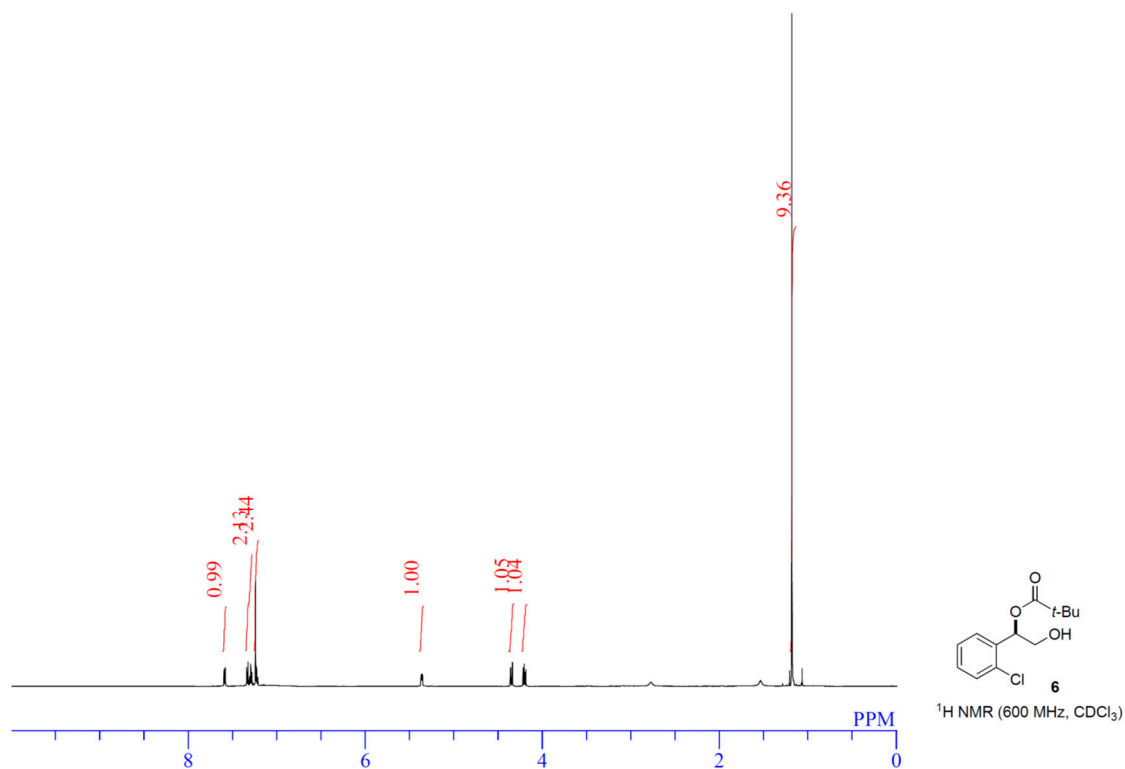Figure S47. Proton NMR of **6**.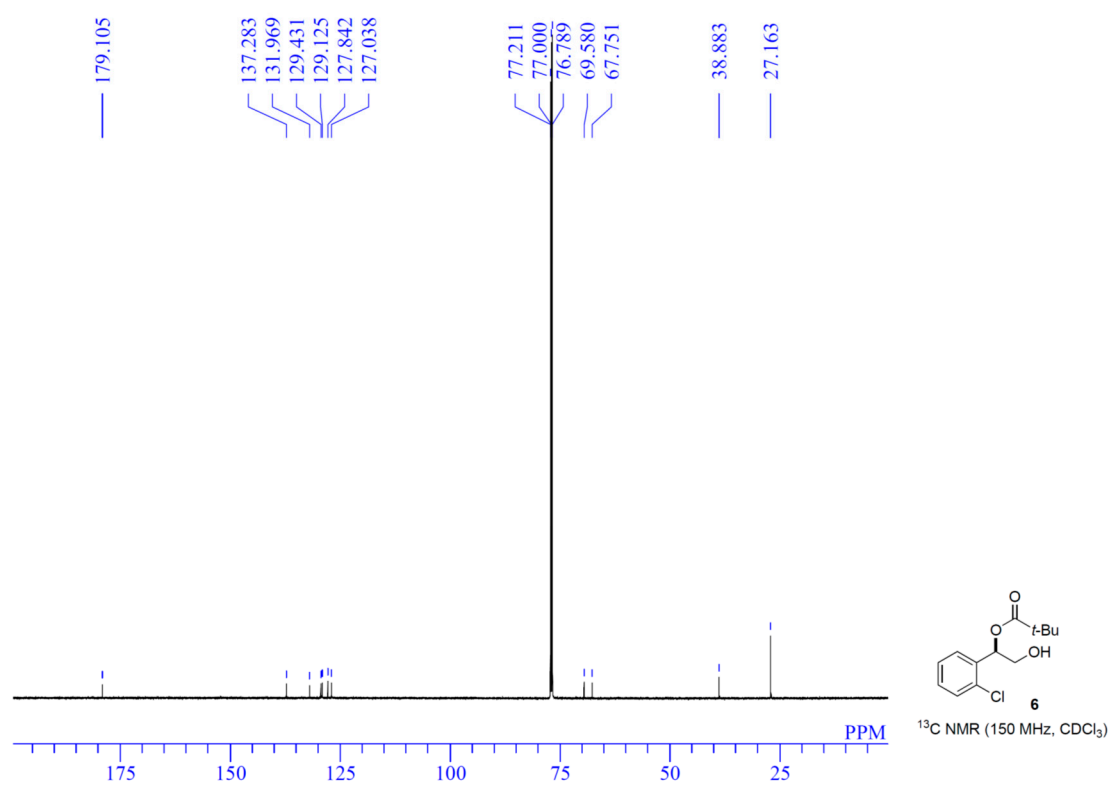Figure S48. Carbon-13 NMR of **6**.



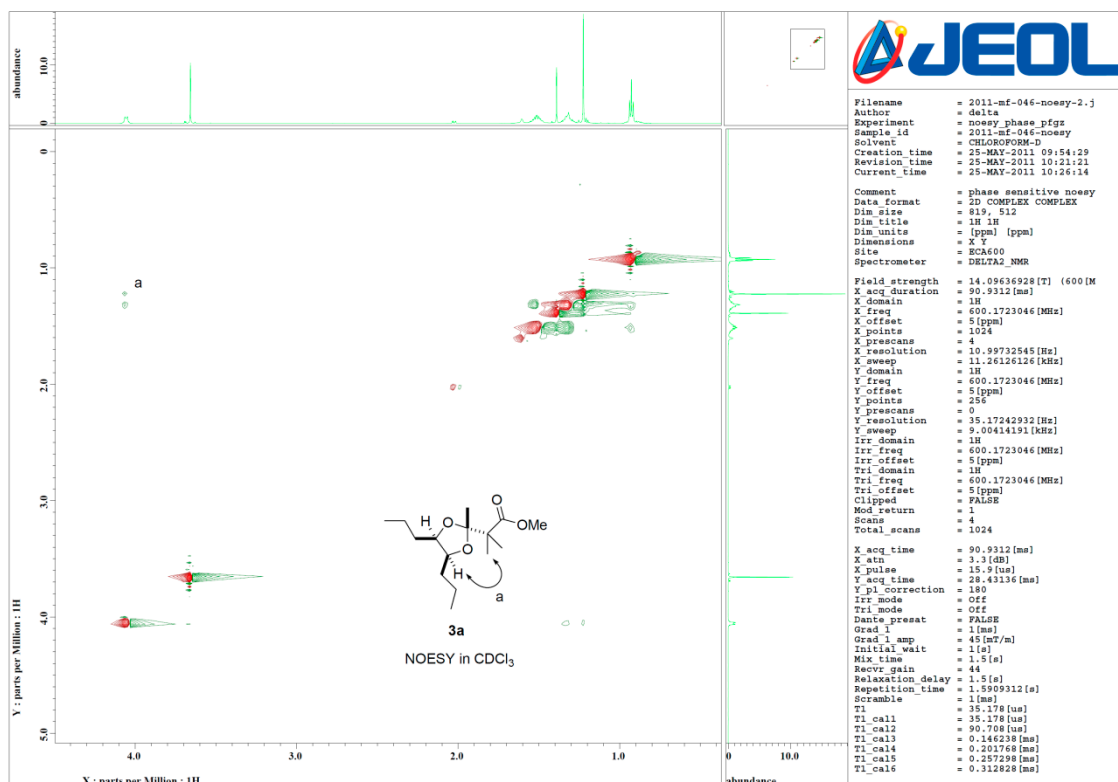Figure S49. NOESY spectrum of **3a**.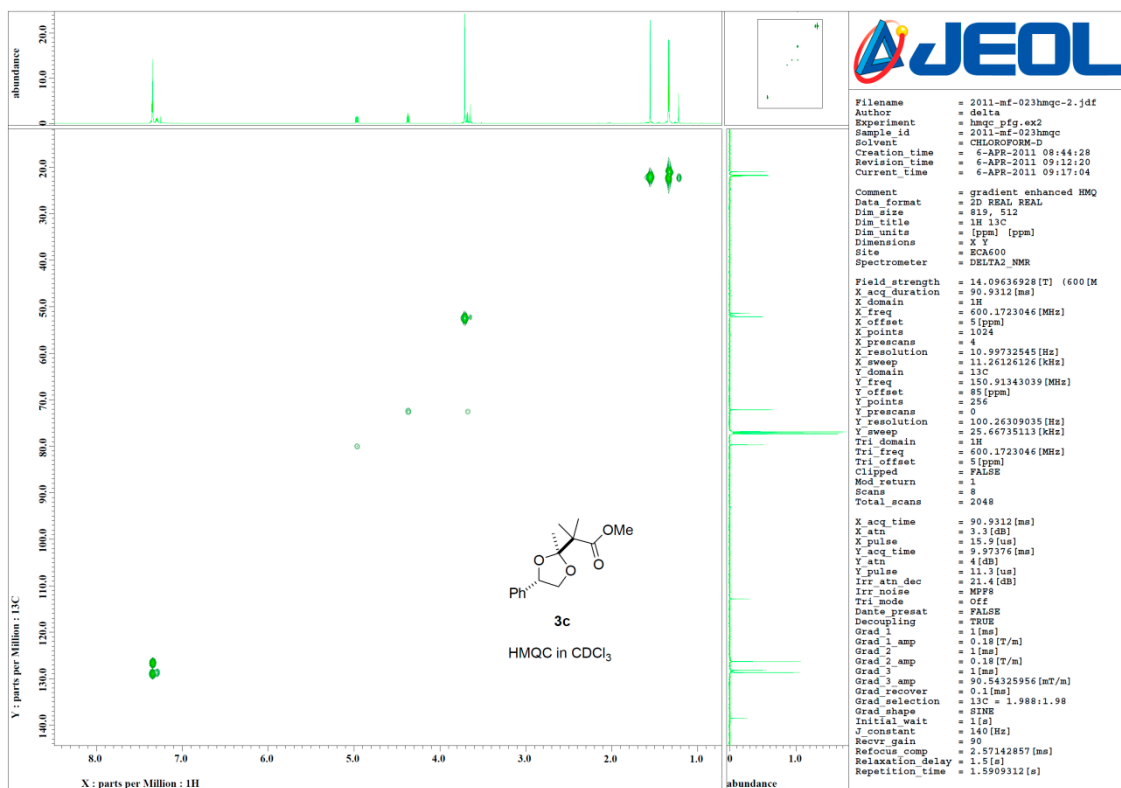Figure S50. HMQC spectrum of **3c**.

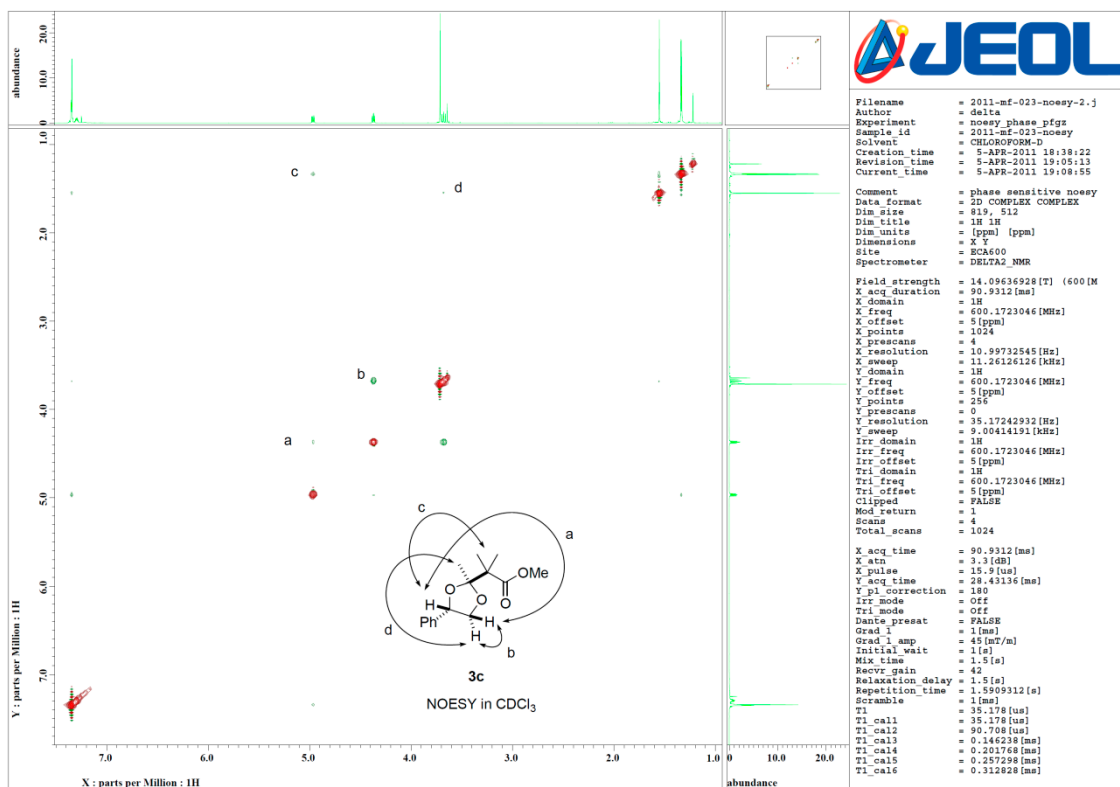

Figure S51. NOESY spectrum of 3c.

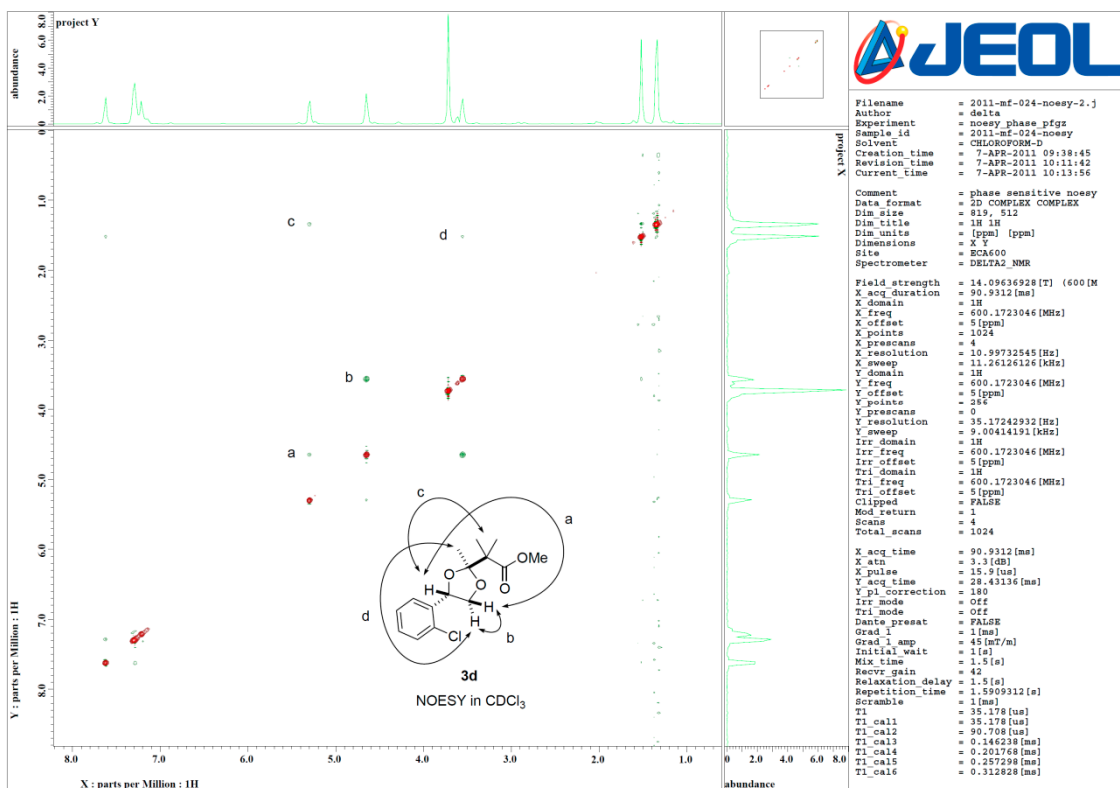

Figure S52. NOESY spectrum of 3d.

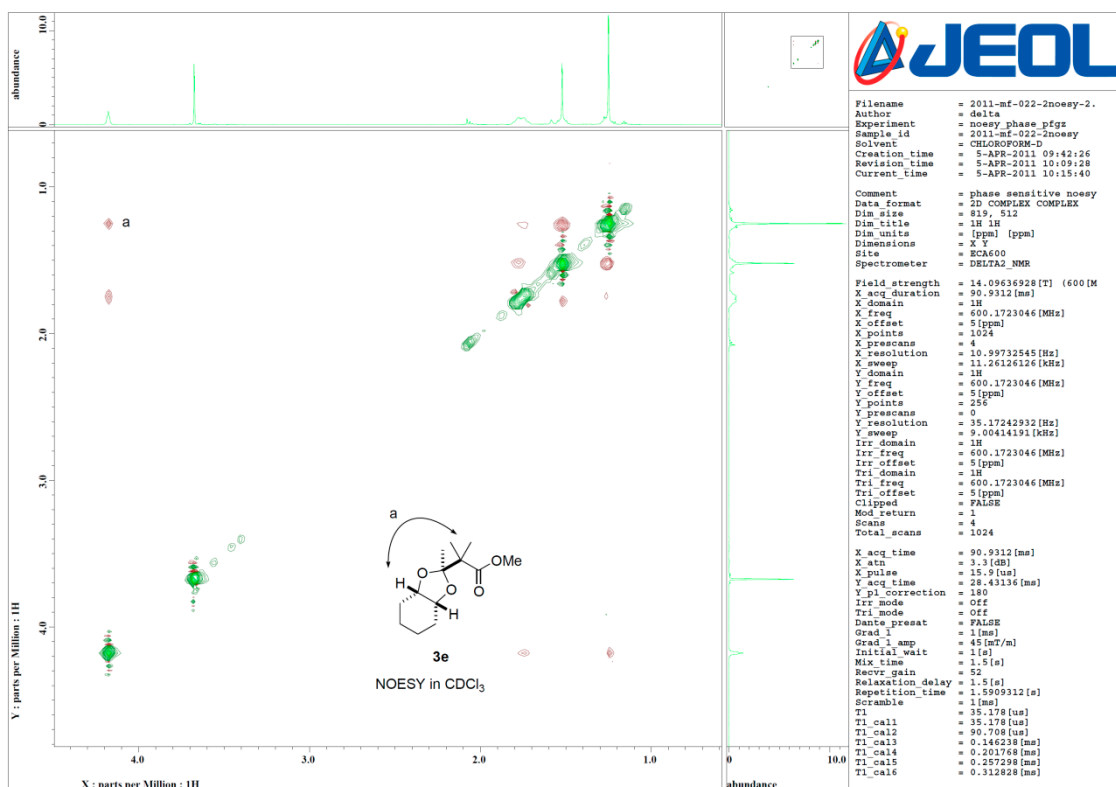

Figure S53. NOESY spectrum of 3e.

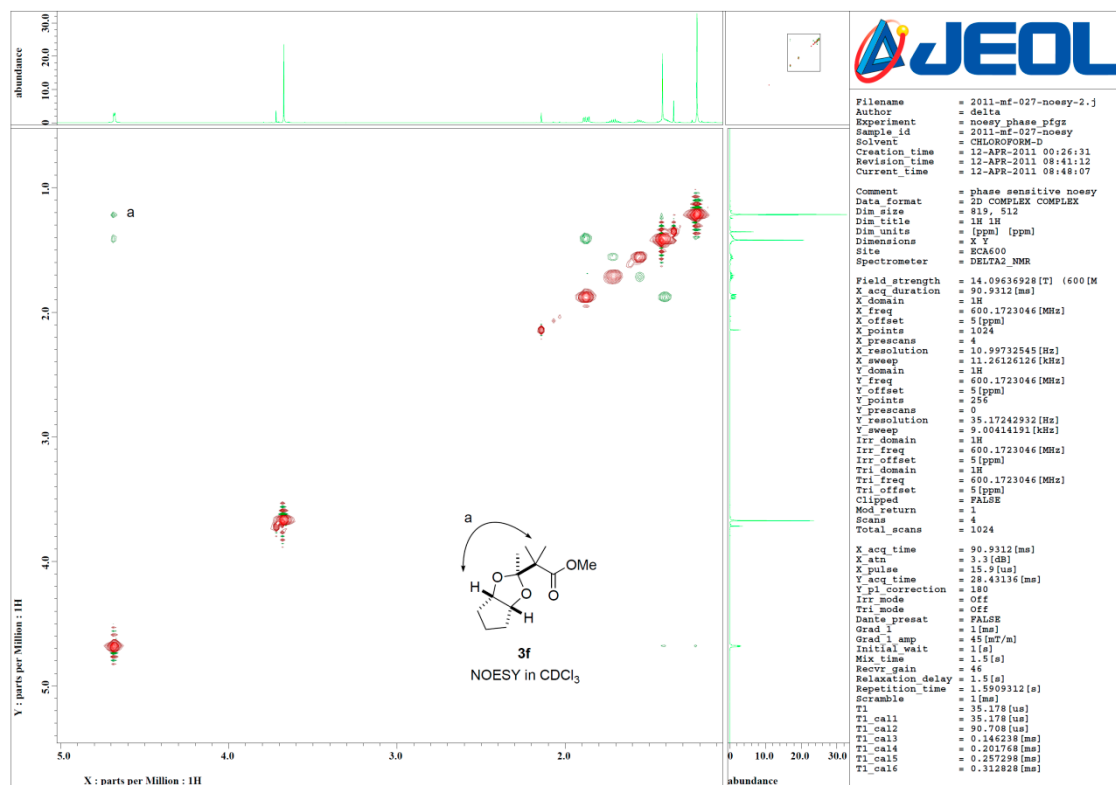

Figure S54. NOESY spectrum of 3f.

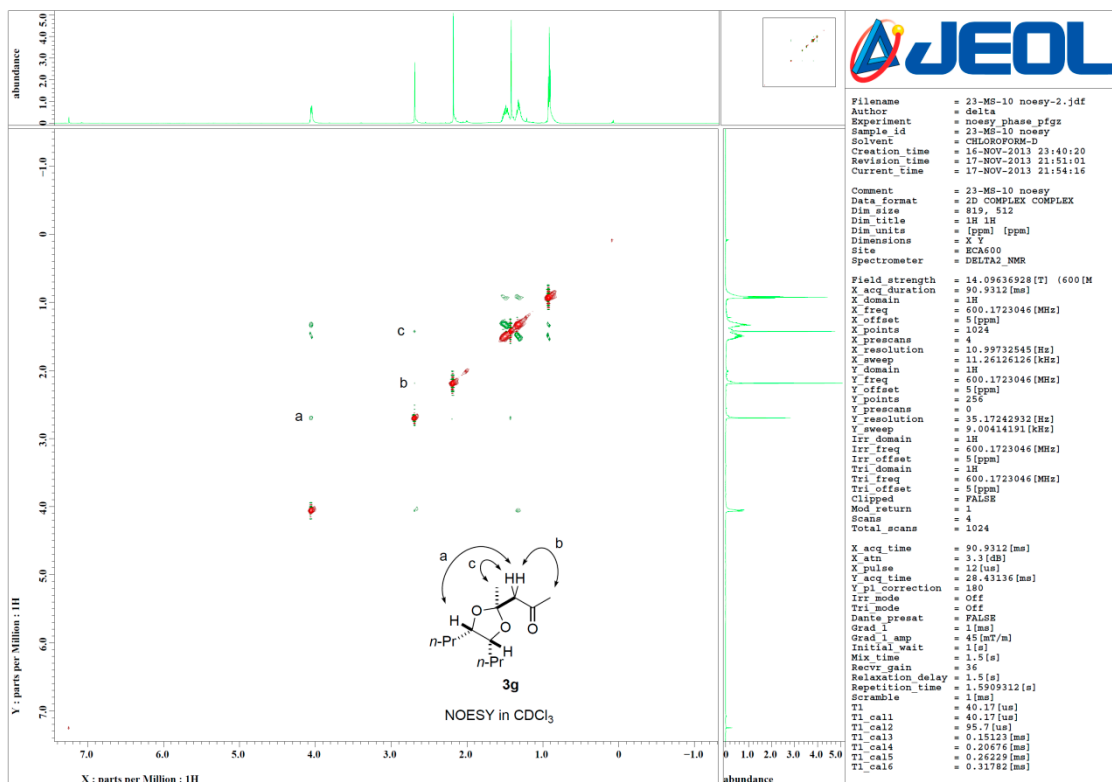Figure S55. NOESY spectrum of **3g**.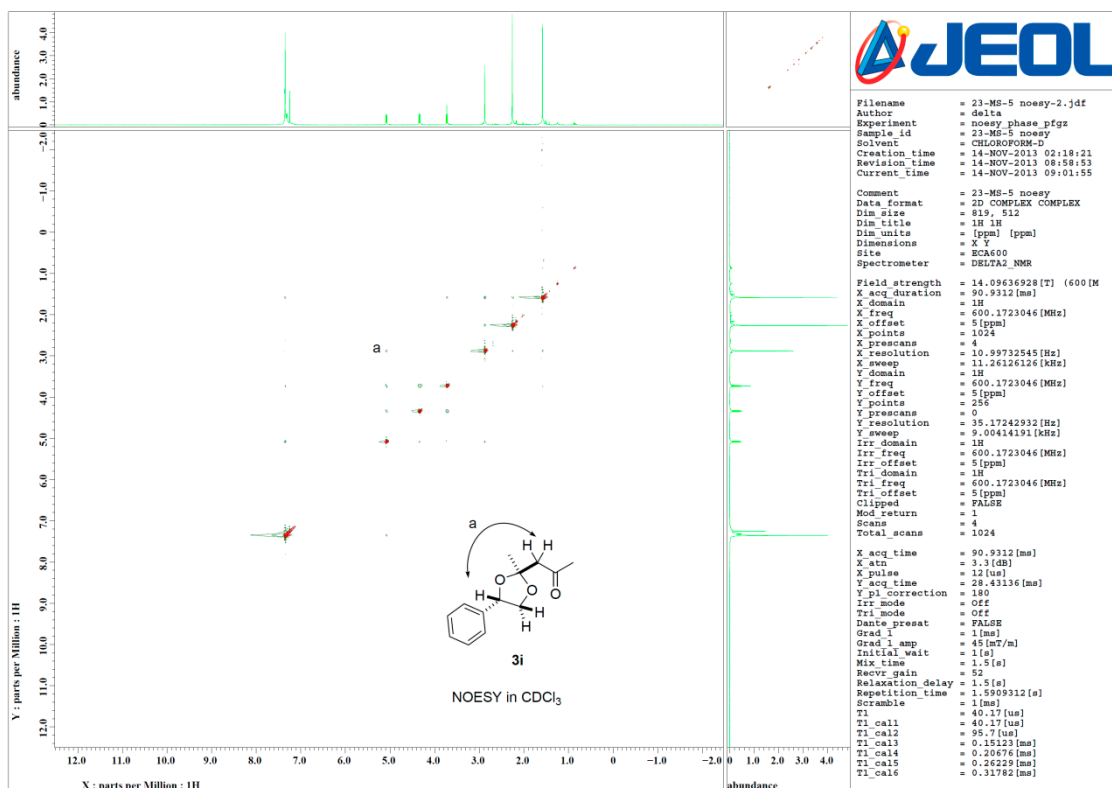Figure S56. NOESY spectrum of **3i**.

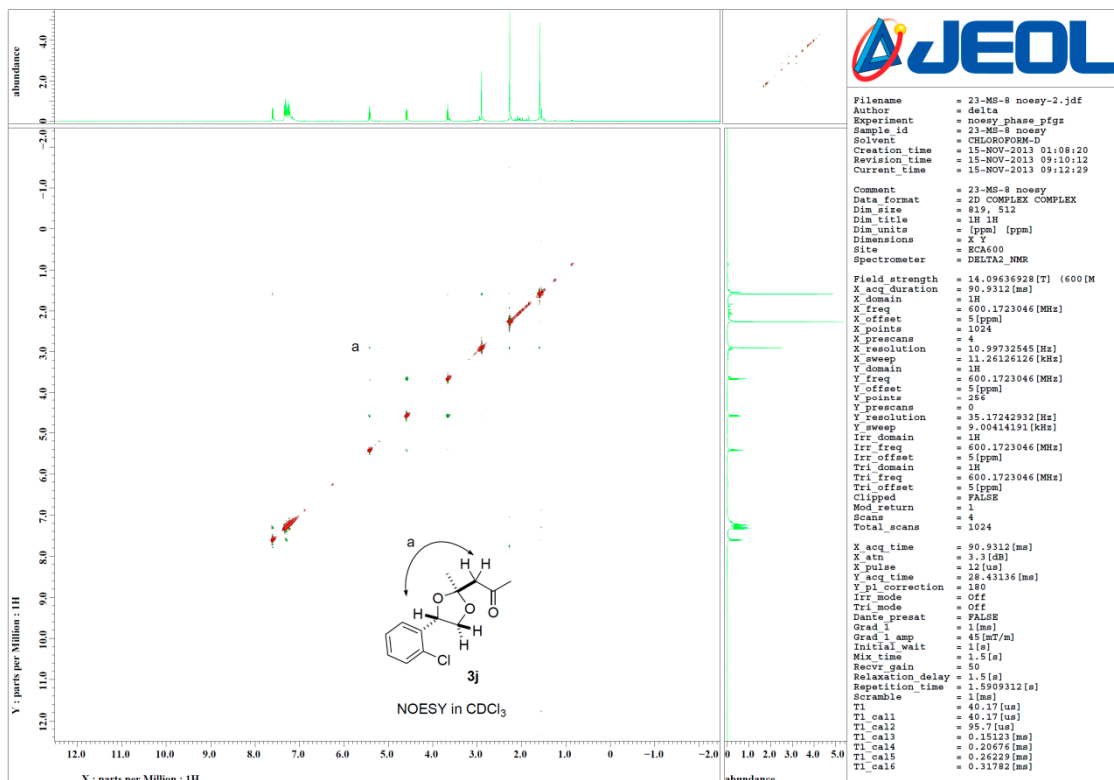

Figure S57. NOESY spectrum of 3j.

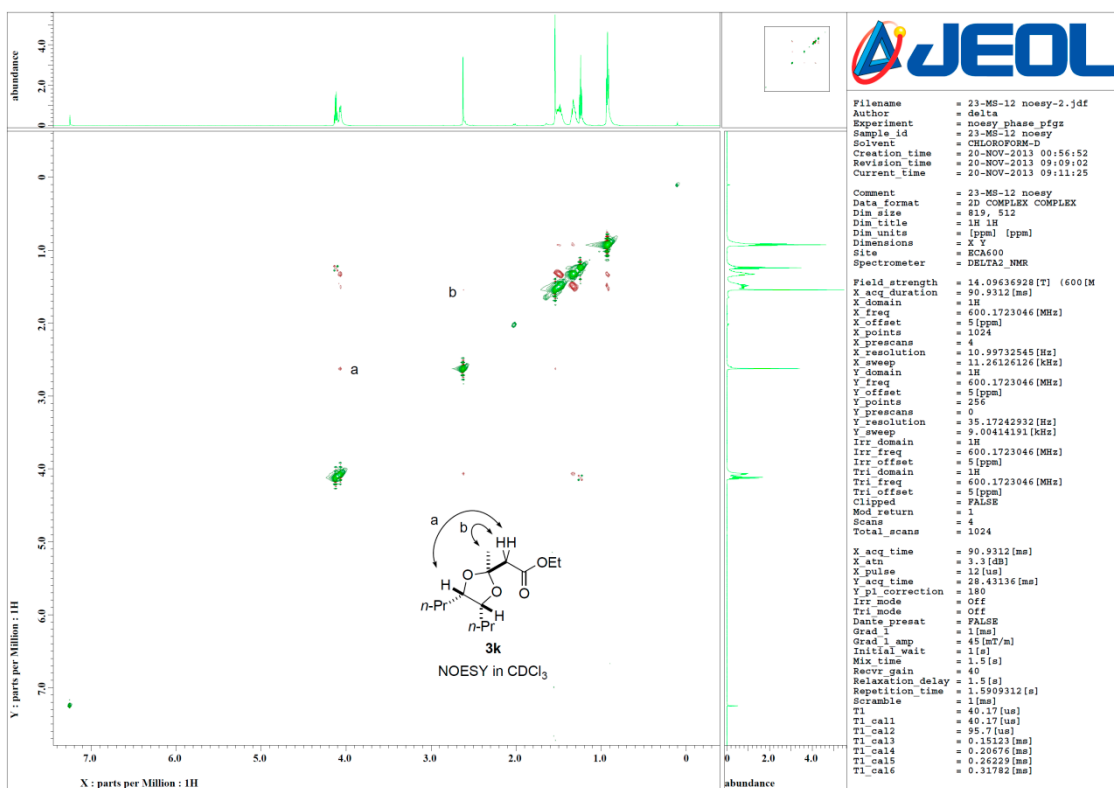

Figure S58. NOESY spectrum of 3k.

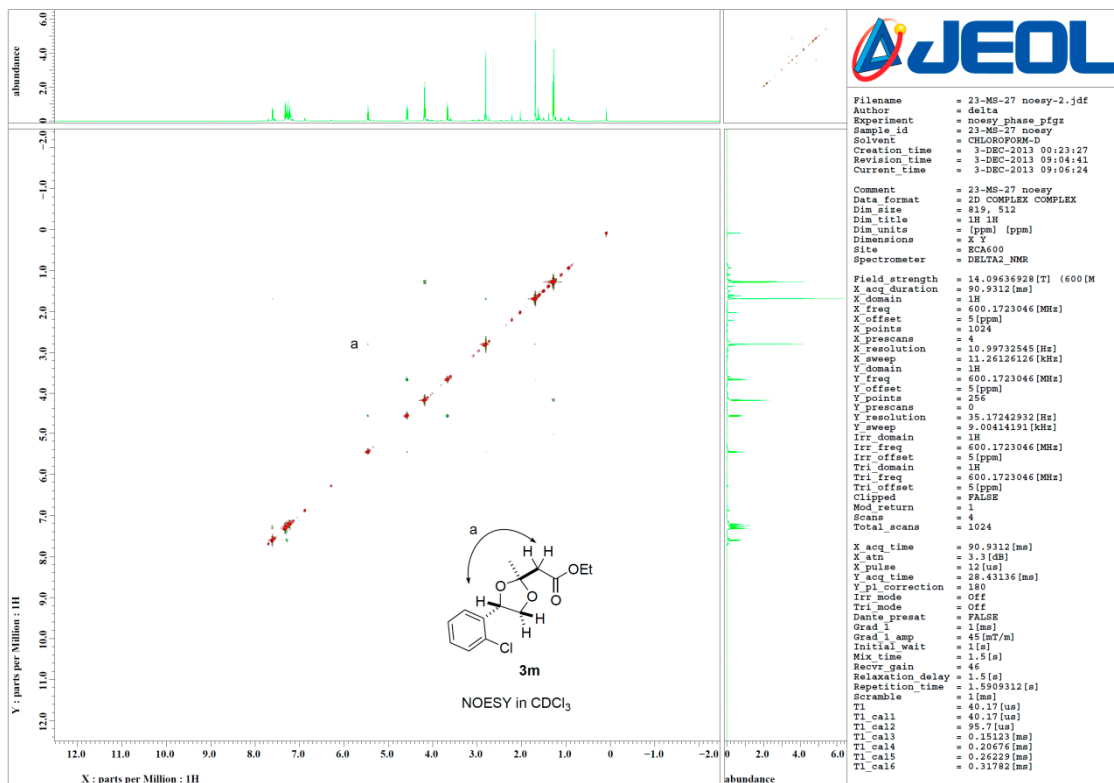Figure S59. NOESY spectrum of **3m**.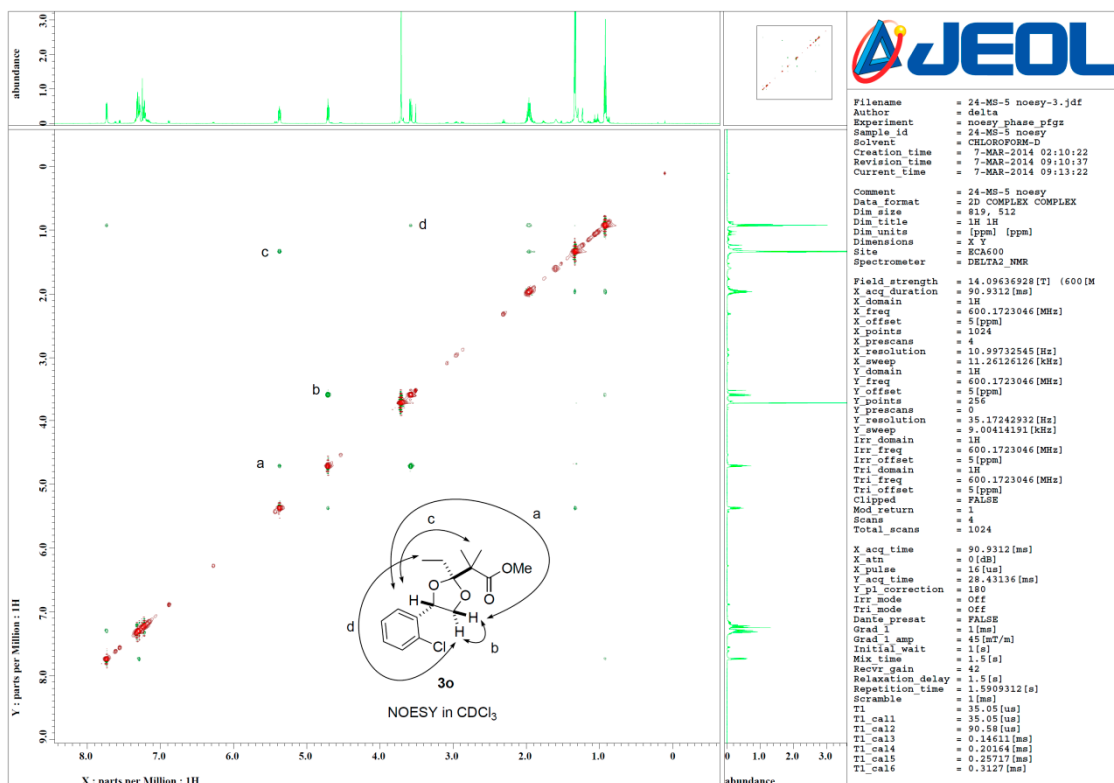Figure S60. NOESY spectrum of **3o**.

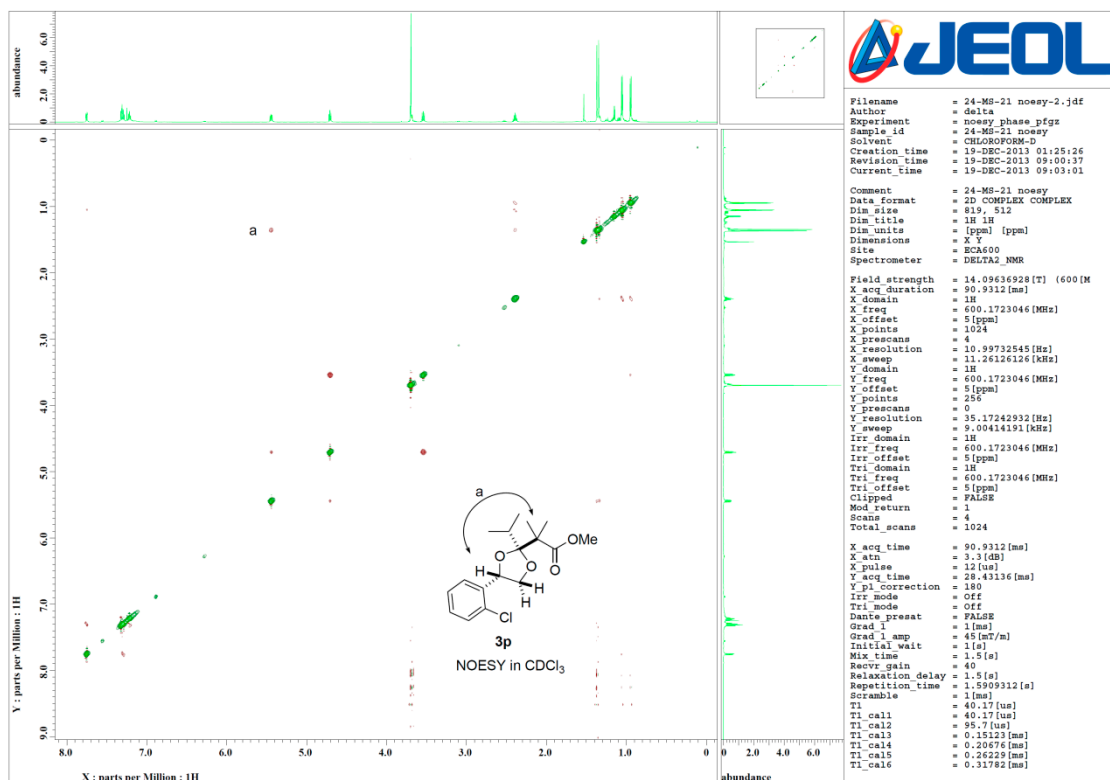Figure S61. NOESY spectrum of **3p**.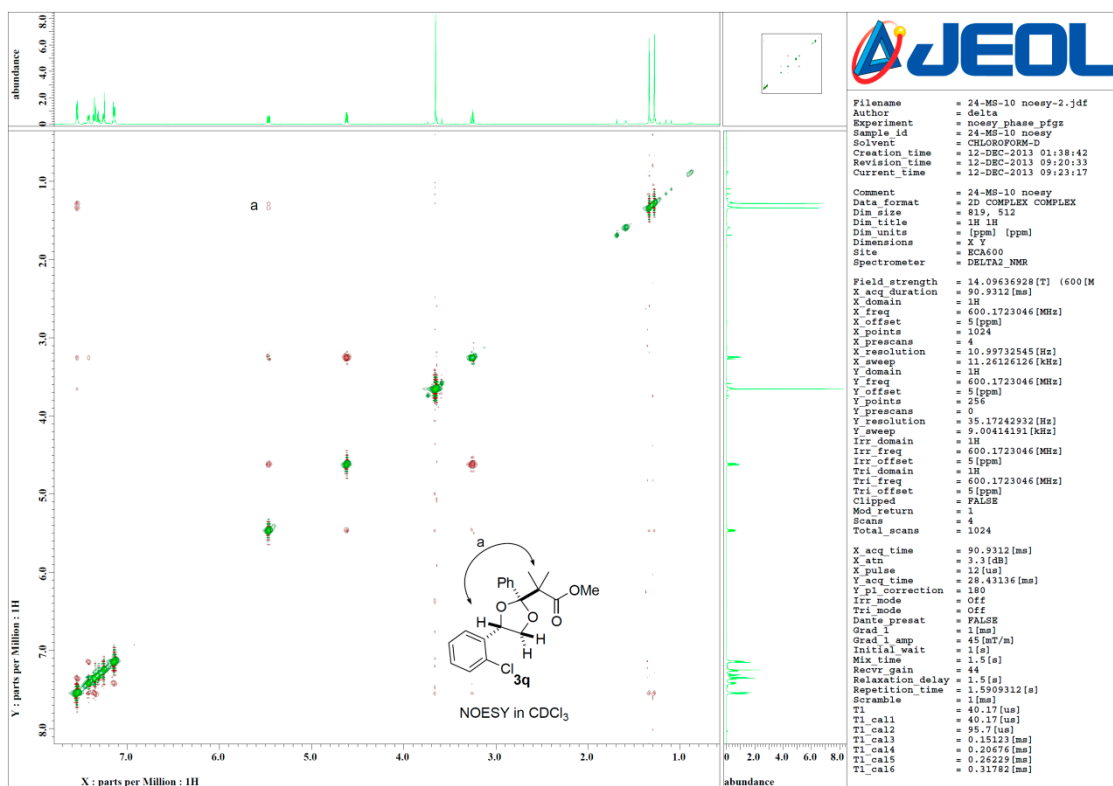Figure S62. NOESY spectrum of **3q**.

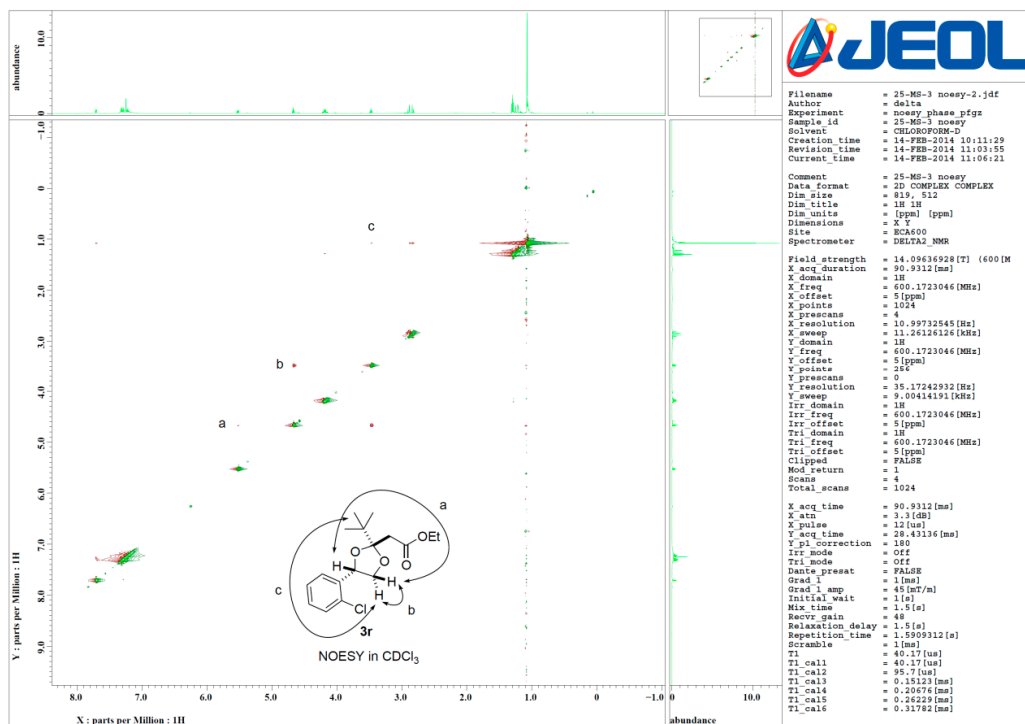

Figure S63. NOESY spectrum of **3r**.

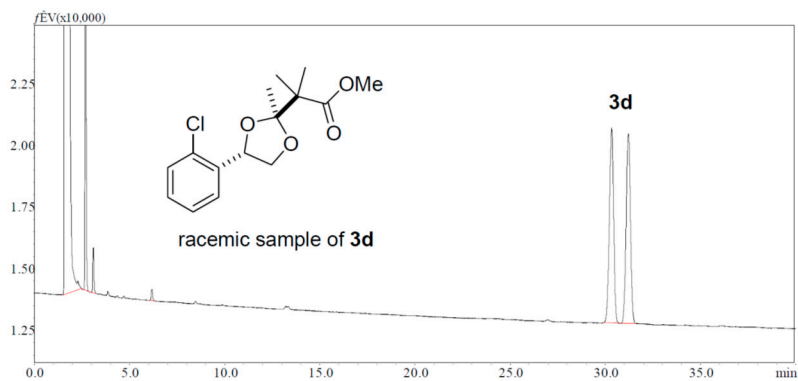

GC trace of racemic sample of **3d** (DEX-CB column at 160 °C).

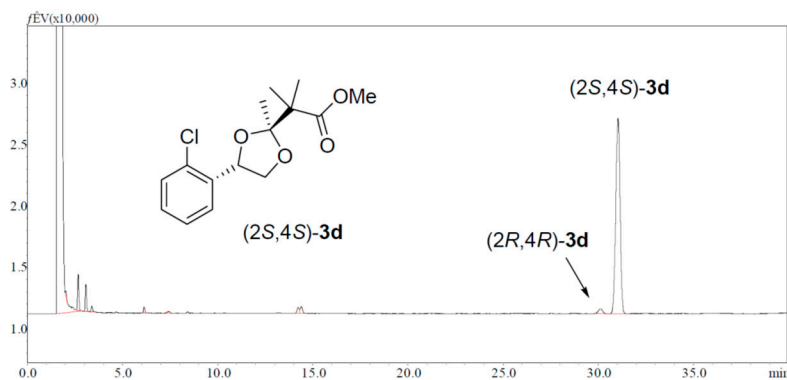

GC trace of optically active **3d** (DEX-CB column at 160 °C).

Figure S64. GC traces of **3d**.



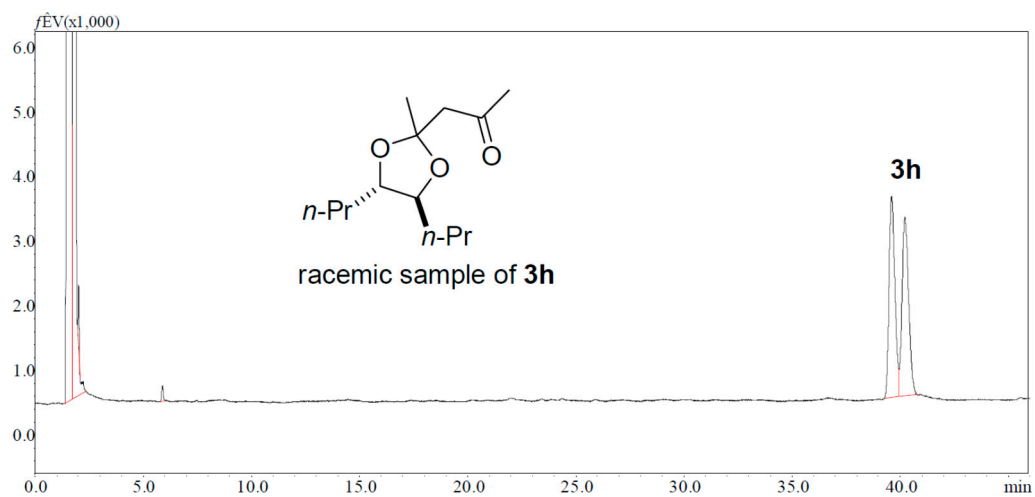

GC trace of racemic sample of **3h** (DEX–CB column 100 °C).

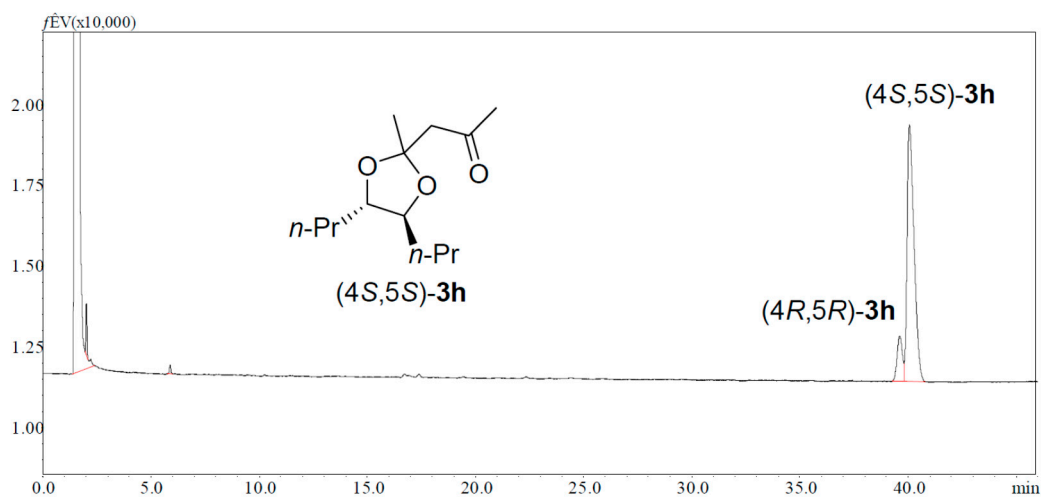

GC trace of optically active **3h** (DEX–CB column at 100 °C).

**Figure S65.** GC traces of **3h**.

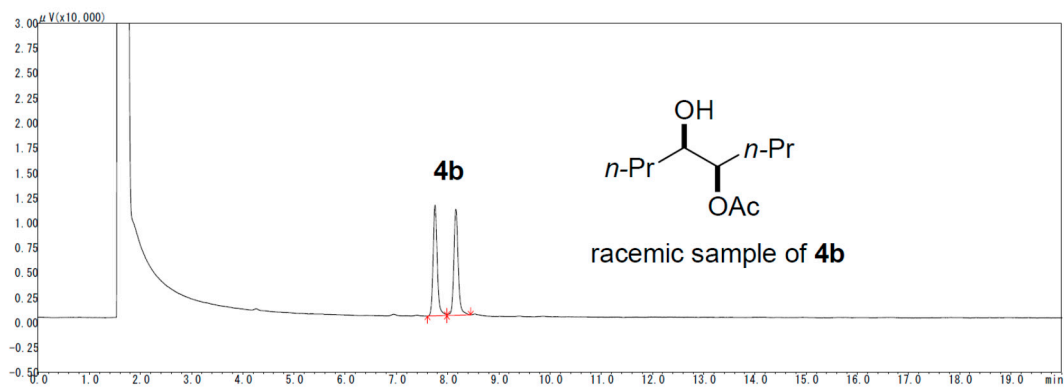

GC trace of racemic sample of **4b** (DEX–CB column at 130 °C).

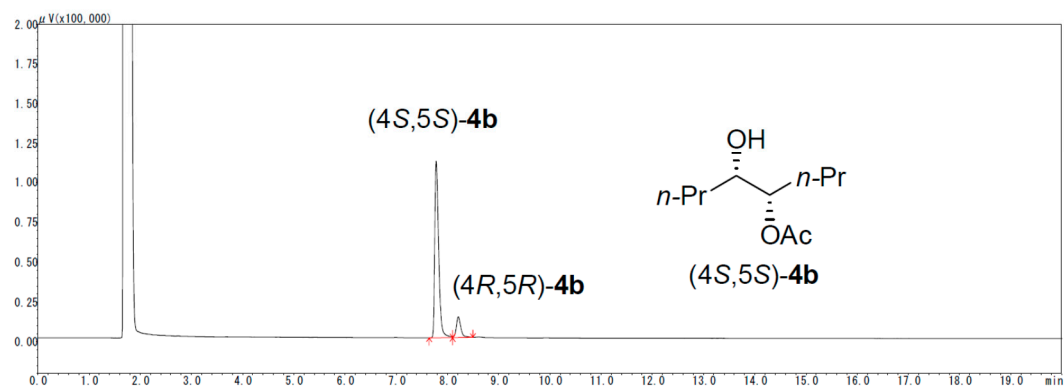

GC trace of optically active **4b** (DEX–CB column at 130 °C).

**Figure S66.** GC traces of **4b**.

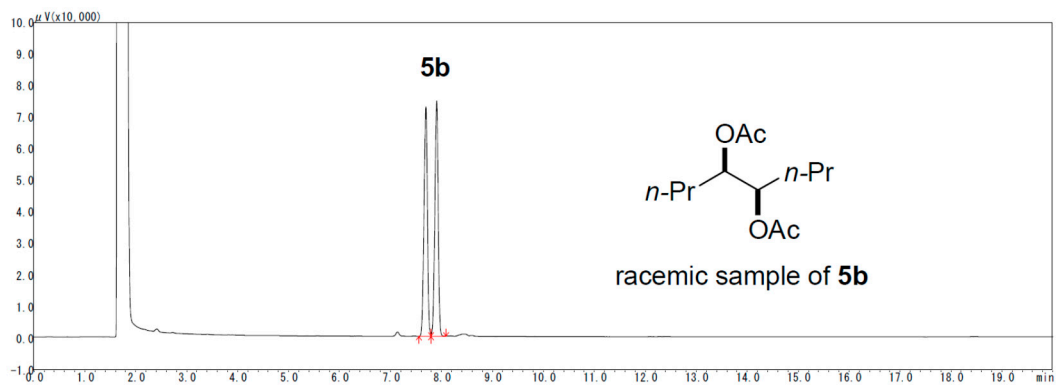

GC trace of racemic sample of **5b** (DEX-CB column at 130 °C).

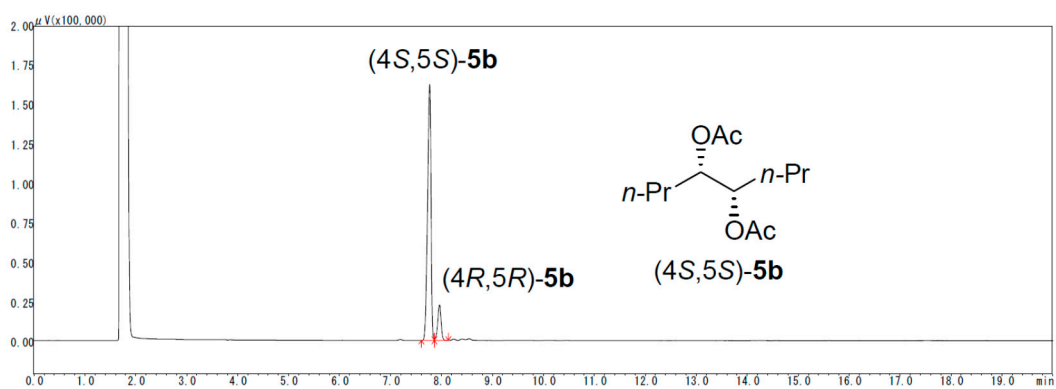

GC trace of optically active **5b** (DEX-CB column at 130 °C).

**Figure S67.** GC traces of **5b**.
